19 **Abstract**

20 Spermatozoa of marine invertebrates are attracted to their conspecific female  
21 gamete by diffusive molecules, called chemoattractants, released from the egg invest-  
22 ments in a process known as chemotaxis. The information from the egg chemoattractant  
23 concentration field is decoded into intracellular  $\text{Ca}^{2+}$  concentration ( $[\text{Ca}^{2+}]_i$ ) changes  
24 that regulate the internal motors that shape the flagellum as it beats. By studying sea  
25 urchin species-specific differences in sperm chemoattractant-receptor characteristics  
26 we show that receptor density constrains the steepness of the chemoattractant concen-  
27 tration gradient detectable by spermatozoa. Through analyzing different chemoattract-  
28 ant gradient forms, we demonstrate for the first time that *Strongylocentrotus purpuratus*  
29 sperm are chemotactic and this response is consistent with frequency entrainment of  
30 two coupled physiological oscillators: i) the stimulus function and ii) the  $[\text{Ca}^{2+}]_i$   
31 changes. We demonstrate that the slope of the chemoattractant gradients provides the  
32 coupling force between both oscillators, arising as a fundamental requirement for sperm  
33 chemotaxis.

## 34 **Introduction**

35 Broadcast spawning organisms, such as marine invertebrates, release their gametes  
36 into open water, where they are often subject to extensive dilution that reduces the  
37 probability of gamete encounter (Lotterhos et al., 2010). In many marine organisms,  
38 female gametes release diffusible molecules that attract homologous spermatozoa  
39 (Lillie, 1913; Miller, 1985; Suzuki, 1995), which detect and respond to chemoattractant  
40 concentration gradients by swimming toward the gradient source: the egg. Although it  
41 was in bracken ferns where sperm chemotaxis was first identified (Pfeffer, 1884), sea  
42 urchins are currently the best-characterized model system for studying sperm  
43 chemotaxis at a molecular level (Alvarez et al., 2012; Cook et al., 1994; Darszon et al.,  
44 2008; Strünker et al., 2015; Wood et al., 2015).

45 The sea urchin egg is surrounded by an extracellular matrix which contains sperm-  
46 activating peptides (SAPs) that modulate sperm motility through altering intracellular  
47  $\text{Ca}^{2+}$  concentration ( $[\text{Ca}^{2+}]_i$ ) and other signaling intermediates (Darszon et al., 2008;  
48 Suzuki, 1995). The biochemical signals triggered by SAPs guide the sperm trajectory  
49 towards the egg.

50 The decapeptide speract is one of best characterized members of the SAP family due  
51 to its powerful stimulating effect on metabolism, permeability and motility in  
52 *Strongylocentrotus purpuratus* and *Lytechinus pictus* spermatozoa. The binding of  
53 speract to its receptor, located in the flagellar plasma membrane, triggers a train of  
54  $[\text{Ca}^{2+}]_i$  increases in immobilized spermatozoa of both species (Wood et al., 2003). This  
55 calcium signal was proposed to regulate the activity of dynein motor proteins in the  
56 flagellum, and thus potentially modulate the trajectory of free-swimming spermatozoa  
57 (Brokaw, 1979; Mizuno et al., 2017).

58 A direct link between  $[\text{Ca}^{2+}]_i$  signaling and sperm motility was established through

59 the use of optochemical techniques to rapidly, and non-turbulently, expose swimming  
60 sea urchin spermatozoa to their conspecific attractant in a well-controlled experimental  
61 regime (Böhmer et al., 2005; Wood et al., 2005). Currently, it is well established that  
62 the transient  $[Ca^{2+}]_i$  increases triggered by chemoattractants produce a sequence of  
63 turns and straight swimming episodes (the “turn-and-run” response), where each  
64 turning event results from a rapid increase in the  $[Ca^{2+}]_i$  (Alvarez et al., 2012; Böhmer  
65 et al., 2005; Kogiku Shiba et al., 2008; Wood et al., 2005). The turn-and-run response  
66 seems to be a general requirement for sperm chemotaxis in sea urchins, however it is  
67 not sufficient on its own to produce a chemotactic response (Guerrero et al., 2010;  
68 Strünker et al., 2015; Wood et al., 2007, 2005).

69 In spite of 30 years of research since speract’s isolation from *S. purpuratus* oocytes  
70 (Hansbrough et al., 1981; Suzuki, 1995), chemotaxis of *S. purpuratus* sperm in the  
71 presence of this peptide has not yet been demonstrated (Cook et al., 1994; Darszon et  
72 al., 2008; Guerrero et al., 2010; Kaupp, 2012; Miller, 1985; Wood et al., 2015). A  
73 comparison between individual *L. pictus* and *S. purpuratus* sperm responses to a  
74 specific chemoattractant concentration gradient generated by photoactivating caged  
75 speract (CS) revealed that only *L. pictus* spermatozoa exhibit chemotaxis under these  
76 conditions (Guerrero et al., 2010). In that study, *L. pictus* spermatozoa experience  
77  $[Ca^{2+}]_i$  fluctuations and pronounced turns while swimming in descending speract  
78 gradients, that result in spermatozoa reorienting their swimming behavior along the  
79 positive chemoattractant concentration gradient. In contrast, *S. purpuratus* spermatozoa  
80 experience similar trains of  $[Ca^{2+}]_i$  fluctuations that in turn drive them to relocate, but  
81 with no preference towards the center of the chemoattractant gradient (Guerrero et al.,  
82 2010).

83 In the present work, we investigate boundaries that limit sperm chemotaxis of marine

84 invertebrates. Particularly, we examined whether the chemoattractant concentration  
85 gradient must have a minimum steepness to provoke an adequate, chemotactic sperm  
86 motility response. Previous studies of chemotactic amoebas crawling up a gradient of  
87 cAMP, have shown that the slope of the chemical concentration gradient works as a  
88 determinant factor in chemotaxis of this species, where the signal-to-noise relationship  
89 of stimulus to the gradient detection mechanism imposes a limit for chemotaxis  
90 (Amselem et al., 2012). In addition, recent theoretical studies by Kromer and colleagues  
91 have shown that, in marine invertebrates, sperm chemotaxis operates efficiently within  
92 a boundary defined by the signal-to-noise ratio of detecting ligands within a  
93 chemoattractant concentration gradient (Kromer et al., 2018).

94 If certain, this detection limit may have prevented the observation and  
95 characterization of chemotactic responses on *S. purpuratus* spermatozoa to date. In this  
96 study, we identify the boundaries for detecting chemotactic signals of *S. purpuratus*  
97 spermatozoa, and show that sperm chemotaxis arises only when sperm are exposed to  
98 much steeper speract concentration gradients than those previously employed by  
99 Guerrero et al. (2010). Furthermore, we examined the coupling between the recruitment  
100 of speract molecules during sperm swimming (i.e. stimulus function) and the internal  
101  $\text{Ca}^{2+}$  oscillator, and demonstrate that sperm chemotaxis arises through coupling of these  
102 physiological oscillators.

## 103 **Results**

### 104 *Species-specific differences in chemoattractant-receptor binding rates:*

#### 105 *chemoattractant sensing is limited by receptor density in S. purpuratus spermatozoa*

106 Spermatozoa measure the concentration and the changes in concentration of  
107 egg-released chemoattractant during their journey. Cells detect chemoattractant  
108 molecules in the extracellular media by integrating chemoattractant-receptor binding  
109 events. A spermatozoon moving in a medium where the chemoattractant concentration  
110 is isotropic will collect stochastic chemoattractant-receptor binding events with a rate  
111  $J$ , according to equation (1) (**Figure 1a**).

$$112 \quad J = 4\pi D a \bar{c} \frac{N}{N + \pi a/s} = J_{max} \frac{N}{N + \pi a/s} \quad (1)$$

113 Where  $D$  is the diffusion coefficient of the chemoattractant,  $a$  is the radius of  
114 the cell,  $\bar{c}$  is the mean chemoattractant concentration,  $N$  is the number of receptor  
115 molecules on the cell surface,  $s$  is the effective radius of the chemoattractant molecule,  
116  $J_{max}$  is the maximal flux that the cell can experience, and  $\frac{N}{N + \pi a/s}$  is the probability that  
117 a molecule that has collided with the cell will find a receptor (Berg and Purcell, 1977).  
118 The quantity  $\pi a/s$  is the number of receptors that allows half maximal binding rate for  
119 any concentration of chemoattractant, which is hereafter denoted as  $N_{1/2}$  (see **1.1. On**  
120 ***the estimate of maximal chemoattractant absorption in supplementary material***).

121 The expression above was used by Berg and Purcell (1977) to conclude that the  
122 chemoattractant binding and adsorption rate saturate as a function of the density of  
123 receptors, becoming diffusion limited, i.e. when  $N \gg N_{1/2} = \pi a/s$  the  
124 chemoattractant adsorption flux becomes  $J \cong J_{max}$  (see **1.1. On the estimate of**  
125 ***maximal chemoattractant absorption in supplementary material***). If the density of  
126 chemoattractant receptor is such that spermatozoa of the different species operate under  
127 this saturated or perfect absorber regime, then any postulated species-specific

128 differences would have to be downstream.

129 In **Table SI** we list the biophysical parameters considered for calculating the  
130 species-specific rate of binding as a function of the chemoattractant concentration. The  
131 different functions of the receptor density and the species receptor density are depicted  
132 in **figure S1**. Our calculations (see **supplementary material**, section *1.1. On the*  
133 *estimate of maximal chemoattractant absorption*) indicate that only *S. purpuratus*  
134 spermatozoa operate in a regime for which the rate of chemoattractant uptake is limited  
135 by receptor density, therefore it cannot be considered as a perfect absorber. The actual  
136 number of speract receptors for this species is approximately  $2 \times 10^4$  per sperm cell  
137 which is fewer than the estimate of  $N_{1/2} \sim 3 \times 10^4$  (**Table SI**). In contrast, *L. pictus* and  
138 *A. punctulata* spermatozoa seem to approximate towards operating as perfect absorbers  
139 (**Figure S1** and **Table SI**). Both observations hold when considering the cylindrical  
140 geometry of the sperm flagellum. A low number of (non-interacting) receptors, sparsely  
141 covering the flagellum (i.e. with a large distance between receptors compared to  
142 receptor size) entails a non-saturated diffusive flux that, hence, depends on the number  
143 of receptors. The cylindrical geometry of the flagellum strengthens the observation that  
144 the larger surface area of the cylinder gives a longer average distance between receptors  
145 and, hence, offsetting the saturation of the overall diffusive flux to higher receptor  
146 number (see section *1.1. On the estimate of maximal chemoattractant absorption* in  
147 **supplementary material**).

148 In conclusion, there are meaningful species-specific differences in  
149 chemoattractant receptor density which could by themselves explain differences in  
150 chemotactic behavior.

151

152 ***Receptor density constrains the chemoattractant concentration gradient detectable***

153 *by spermatozoa*

154 A functional chemotactic signaling system must remain unresponsive while the  
155 cell swims through an isotropic chemoattractant concentration field and must trigger a  
156 directional motility response if the cell moves across a concentration gradient (**Figure**  
157 **1a-c**). This absolute prerequisite of the signaling system defines the minimal  
158 quantitative constraints for reliable detection of a gradient and therefore for chemotaxis.

159 A cell moving along a circular trajectory in an isotropic chemoattractant field  
160 (**Figure 1a**) will collect a random number of chemoattractant-receptor binding events  
161 during the half revolution time  $\Delta t$ , that has a Poisson distribution with mean  $J\Delta t$  and  
162 standard deviation  $\sqrt{J\Delta t}$ . Because under these conditions there is no spatial positional  
163 information to guide the cell, the chemotactic signaling system must be unresponsive  
164 to the fluctuations in the number of binding events expected from the Poisson noise.

165 The chemotactic response should only be triggered when the cell moves into a  
166 concentration gradient (**Figures 1b** and **1c**) sufficiently large to drive binding event  
167 fluctuations over the interval  $\Delta t$  with an amplitude that supersedes that of the  
168 background noise. As derived in the **supplementary material**, section *1.2. A condition*  
169 *for detecting a change in the chemoattractant concentration*, the reliable detection of  
170 a chemoattractant gradient requires the following condition dependent on the maximal  
171 concentration difference experienced during half a revolution and on the mean  
172 chemoattractant concentration  $\bar{c}$ :

173 
$$\left(4\pi D a \bar{c} \frac{N}{N + \pi a / s} \Delta t\right) v \Delta t \frac{\partial c}{\partial r} \bar{c}^{-1} > \sqrt{4\pi D a \bar{c} \frac{N}{N + \pi a / s} \Delta t}, \quad (2)$$

174 Noting that the left-hand side of the condition represents the chemotactic signal and  
175 the right-hand side is a measurement of the background noise, equation (2) can be  
176 rewritten in terms of signal-to-noise ratio:



177 
$$SNR = v\Delta t^{3/2} \left( 4\pi Da\bar{c} \frac{N}{N + \pi a/s} \right)^{1/2} \xi > 1, \quad (3)$$

178 Where  $v$  is the mean linear velocity  
179 ( $\frac{\Delta r}{\Delta t}$ , where  $\Delta r$  is the sampling distance or diameter of the swimming circle), and  
180  $\xi = \bar{c}^{-1} \frac{\partial c}{\partial r}$  is the relative slope of the chemoattractant concentration gradient (see  
181 section **1.2. A condition for detecting a change in the chemoattractant concentration**  
182 in **supplementary material** for the derivation). This quantity  $\xi$  measures the strength  
183 of the stimulus received when sampling a position  $r$ , relative to the mean concentration  
184  $\bar{c}$  (**Figure 1c**). As  $\xi$  increases, the strength of the chemotactic signal increases.

185 Equation (3) means that the ability to reliably determine the source of the attractant  
186 depends critically on the relative slope of the chemoattractant concentration gradient  $\xi$ ,  
187 which must be steep enough to be distinguishable from noise (**Figures 1b** and **1c**, and  
188 **Table SI**; for further explanation see **1.2. A condition for detecting a change in the**  
189 **chemoattractant concentration in supplementary material**).

190

191 We modeled the  $SNR$  corresponding to different gradients, and within a range of mean  
192 concentrations of chemoattractant between  $10^{-11}$  to  $10^{-6}$  M for three sea urchin species:  
193 *S. purpuratus*, *L. pictus* and *A. punctulata* (**Figures 1d-f**). For all species studied, at  
194 high mean concentrations of chemoattractant ( $10^{-8}$  to  $10^{-6}$  M), the change in  
195 chemoattractant receptor occupancy experienced at two given distinct positions allows  
196 reliable assessment of relatively shallow chemical gradients ( $\xi \sim [10^{-3}, 10^{-4}] \mu\text{m}^{-1}$ ), with  
197  $SNR > 1$  for a wide range of  $\xi$  (**Figures 1d-f**). However, at low concentrations of  
198 chemoattractant (below  $10^{-8}$  M), keeping all other parameters equal, stochastic  
199 fluctuations begin to mask the signal. In this low-concentration regime, the steepness  
200 of the chemoattractant concentration gradient is determinant for chemoattractant

201 detection. Shallow gradients result in insufficient  $SNR$ , while steeper chemoattractant  
202 gradients ( $\zeta > 10^{-3} \mu\text{m}^{-1}$ ) are dependably detected by spermatozoa, i.e.  $SNR > 1$  (**Figures**  
203 **1d-f**).

204 Previous reports show that *A. punctulata* spermatozoa are very sensitive to resact  
205 (presumably reacting to single molecules) due the high density of resact receptors  
206 ( $\sim 3 \times 10^5$  per cell), which allows them to sense this chemoattractant at low picomolar  
207 concentrations (Kashikar et al., 2012). In contrast, *L. pictus* and *S. purpuratus*  
208 spermatozoa bear lower densities of chemoattractants receptors, approximately  $6.3 \times 10^4$   
209 and  $2 \times 10^4$  receptors/cell, respectively (Nishigaki et al., 2001; Nishigaki and Darszon,  
210 2000). According to these species-specific differences in chemoattractant receptor  
211 densities, **figures 1d-f** suggest that the spermatozoa of *A. punctulata* are likely more  
212 sensitive to resact, than those of either *L. pictus* or *S. purpuratus* species to the same  
213 mean concentration gradients of speract; with the spermatozoa of *S. purpuratus* being  
214 less sensitive than those of *L. pictus* species to equivalent speract gradients and mean  
215 concentrations. Moreover, the constraints on  $SNR$  imply that *S. purpuratus* spermatozoa  
216 should only respond to the chemoattractants at higher mean speract concentrations and  
217 at steeper gradients than those that elicit chemotaxis in *L. pictus* spermatozoa (compare  
218 **Figures 1d and 1e**).

219 To understand the differential sensitivity between the spermatozoa of *S. purpuratus*  
220 and *L. pictus* we analyzed the scenario in which the capacity to detect the gradient for  
221 both spermatozoa species were equal, i.e. they would have the same signal-to-noise  
222 ratios,  $SNR_{purpuratus} = SNR_{pictus}$ . We compute the ratio of the slopes of the speract  
223 concentration gradient experienced by either *S. purpuratus* or *L. pictus* spermatozoa,  
224 which represents a scaling factor ( $SF$ ) in the gradient slope, expressed as:

$$225 \quad SF = \frac{\xi_{purpuratus}}{\xi_{pictus}} = \left( \frac{v_{pictus}}{v_{purpuratus}} \right) \left( \frac{\Delta t_{pictus}}{\Delta t_{purpuratus}} \right)^{3/2} \left( \frac{Z_{pictus}}{Z_{purpuratus}} \right)^{1/2} \sim 3, \quad (4)$$

226 where  $Z = \left( \frac{Na}{N + \pi a/s} \right)$  is the probability that a speract molecule that has collided with  
227 the cell will bind to a receptor (Berg and Purcell, 1977), multiplied by the radius  $a$  of  
228 the cell.

229 The estimation of the scaling factor  $SF$  predicts that *S. purpuratus* spermatozoa  
230 should undergo chemotaxis in a speract gradient three times steeper than the gradient  
231 that elicits chemotaxis in *L. pictus* spermatozoa, with  $\xi_{purpuratus} \sim 3\xi_{pictus}$ .

232 In summary, the chemoreception model suggests that *S. purpuratus* spermatozoa  
233 detect chemoattractant gradients with lower sensitivity than those of *L. pictus*. It also  
234 predicts that *S. purpuratus* spermatozoa may detect chemoattractant gradients in the  $10^{-9}$   
235 M regime with sufficient certainty only if the slope of the chemoattractant  
236 concentration gradient is greater than  $3 \times 10^{-3} \mu\text{m}^{-1}$  (i.e. steep concentration gradients)  
237 (**Figure 1d**).

238

239 If the latter holds true, then *S. purpuratus* spermatozoa should be able to experience  
240 chemotaxis when exposed to steeper speract gradients than those tested experimentally  
241 so far. Given this prediction, we designed and implemented an experimental condition  
242 for which we expect *S. purpuratus* spermatozoa to experience chemotaxis. In general  
243 terms, this scaling rule for sensing chemoattractant gradients might also apply for other  
244 species of marine invertebrates.

245

#### 246 *S. purpuratus* spermatozoa accumulate at steep speract concentration gradients

247 Our experimental setup is designed to generate determined speract concentration  
248 gradients by focusing a brief (200 ms) flash of UV light along an optical fiber, through  
249 the objective, and into a field of swimming *S. purpuratus* spermatozoa containing  
250 caged-speract (CS) at 10 nM in artificial sea water (Guerrero et al., 2010; Tatsu et al.,

251 2002). To test experimentally whether *S. purpuratus* spermatozoa undergo chemotaxis,  
252 as predicted from the chemoreception model, we varied the slope of the speract  
253 concentration gradient by separately employing four optical fibers of distinct diameters,  
254 arranged into five different configurations ( $f1, f2, f3, f4, f5$ ) (**Figure 2c**).

255 Each configuration produces a characteristic pattern of UV illumination within the  
256 imaging field (**Figure 2c**). The UV intensity, measured at the back focal plane of the  
257 objective for each fiber configuration, is shown in **Table SII**. The spatial derivative of  
258 the imaged UV light profile was computed as a proxy for the slope of the speract  
259 concentration gradient (**Figure 2b**). By examining these UV irradiation patterns, the  
260 highest concentration of speract released through photo-liberation from CS is generated  
261 by the  $f5$  fiber, followed by  $f4 > f3 > f2 > f1$  (**Figure 2a**). The steepest UV irradiation  
262 gradients are those generated by the  $f2, f3$  and  $f5$  fibers (**Figure 2b**).

263 Irrespective of the optical fiber used, the photo-activation of caged speract triggers  
264 the stereotypical  $\text{Ca}^{2+}$ -dependent motility responses of *S. purpuratus* spermatozoa  
265 (**Figures 2d, Movies 1, S1, S4-S6**). To determine whether these changes lead to sperm  
266 accumulation, we developed an algorithm, which automatically scores the number of  
267 spermatozoa at any of the four defined concentric regions (R1, R2, R3, and R4) relative  
268 to the center of the speract concentration gradient (**Figures 3a and S2**).

269 As you can see in **Table I**, the photo-liberation of speract through the different fibers  
270 used here triggered various response types (**Figures 3b, 3c and S3**). Negative controls  
271 (Low  $[\text{Ca}^{2+}]_i$  or High extracellular  $\text{K}^+$  ( $[\text{K}^+]_e$ ) for  $f2$  gradient) did not show increased  
272 sperm numbers in any region (**Figures 3b and S3; Movies S2 and S3**, respectively).

273 In summary, *S. purpuratus* spermatozoa accumulate significantly towards the center  
274 of the speract gradients generated by the  $f2$ - and  $f3$ -fibers, which provide UV light  
275 profiles with steeper slopes compared to the  $f1$  and  $f4$  fibers (**Figure 2b**). These

276 observations agree with the chemoreception model, in that spermatozoa exposed to  
277 steeper gradients experience lower uncertainty (i.e. higher *SNR*) to determine the  
278 direction of the source of the chemoattractant.

279 Notably, the use of  
280 fibers *f4* and *f5* uncages higher concentrations of speract (by providing higher UV  
281 energies than other fibers) (**Figure 2a** and **Table SII**), yet they do not trigger the  
282 maximum accumulation of *S. purpuratus* spermatozoa at the center of the  
283 chemoattractant field.

284

285 *S. purpuratus* spermatozoa undergo chemotaxis upon exposure to steep speract  
286 gradients

287 The sperm accumulation responses observed in any of *f2* and *f3* conditions suggest  
288 that the slope of the chemoattractant concentration gradient might indeed function as a  
289 driving force for sperm chemotaxis. However, the accumulation of spermatozoa at the  
290 center of the field might also imply other factors, such as cell trapping, or cell death  
291 (Yoshida and Yoshida, 2011).

292 To more reliably scrutinize the trajectories described by *S. purpuratus* spermatozoa  
293 in response to speract gradients, chemotactic behavior was quantified using a chemo-  
294 tactic index (CI) that considers the sperm speed and direction both before and after the  
295 chemotactic stimulus (see **Figures 4a** and **4b**). This CI takes values from -1 (negative  
296 chemotaxis) to 1 (positive chemotaxis), with 0 being no chemotaxis at all (**Movie 3**).  
297 The temporal evolution of the CI, for each of *f1*, *f2*, *f3*, *f4*, *f5* speract concentration  
298 fields, was computed (**Figure 4c**), and their distributions across time were analyzed by  
299 a binomial test (**Figure 4d**, and **Movie S7**) (for further explanation, see *Chemotactic*  
300 *index* section in **Materials and methods**).

301           The speract fields created by fibers  $f_2$ ,  $f_3$  and  $f_5$  produce significantly positive  
302 CI values compared to other conditions ( $f_1$ ,  $f_4$  and negative controls), confirming that  
303 steeper speract concentration gradients trigger chemotactic responses in *S. purpuratus*  
304 spermatozoa. Again, the lack of chemotactic responses in *S. purpuratus* spermatozoa  
305 observed by Guerrero et al., 2010, was reproduced through stimulation with  $f_4$ , zero  
306  $\text{Ca}^{2+}$ , or High  $\text{K}^+$  experimental regimes (a scrutiny of non-chemotactic cells is presented  
307 in **Figure S8** and section 2.7. *Sperm swimming behavior in different chemoattractant*  
308 *gradients* in supplementary material).

309

310           Chemotactic efficiency, which in our work is reported by CI, contains information  
311 regarding the capability of single cells to detect and undergo a direct response towards  
312 a chemotactic stimulus. It also provides information about the percent of responsive  
313 cells that, after detecting a stimulus, can experience chemotaxis. As sperm chemotaxis,  
314 and chemotaxis in general, has evolved to operate optimally in the presence of noise  
315 (Amselem et al., 2012; Kromer et al., 2018; Lazova et al., 2011), we examined the  
316 boundary of *SNR* where sperm chemotaxis operates efficiently for *S. purpuratus* sper-  
317 matozoa (**Figure 4e**). Take into account that in the regime of  $SNR < 1$ , chemotactic  
318 efficiency scales monotonically; for  $SNR > 1$ , saturation or adaptation mechanisms  
319 might impinge on the chemotactic efficiency, as reported in other chemotactic signaling  
320 systems (Amselem et al., 2012; Kromer et al., 2018; Lazova et al., 2011). In agreement  
321 with these results, we found that the percentage of *S. purpuratus* spermatozoa experi-  
322 encing relocation increases monotonically with the *SNR* (**Figure 4f**), within the noise  
323 limits of  $0.1 < SNR < 0.8$ , which is also in agreement with the findings of sperm chem-  
324 otaxis operating optimally in the presence of noise (Amselem et al., 2012; Kromer et  
325 al., 2018; Lazova et al., 2011).

326

327 ***The magnitude of slope of the gradient is a major determinant of sperm chemotaxis***

328 The spatial derivative of the UV profiles shown in **figure 2b** indicates that the  
329 steeper light gradients generated from UV irradiation are those of  $f_2$ ,  $f_3$  and  $f_5$ , which  
330 are assumed to generate the steepest speract gradients of similar form. This assumption  
331 is strictly valid at the instant of UV exposure; subsequently the speract gradient  
332 dissipates over time with a diffusion coefficient of  $D \approx 240 \mu\text{m}^2\text{s}^{-1}$ . However, the  
333 gradient steepness that each spermatozoon experiences during swimming is determined  
334 by the combination of UV flash duration, the speract diffusion time, and the sperm  
335 motility response by itself.

336 In nature, spermatozoa of external fertilizers tend to swim in spiral 3D trajectories.  
337 However, under the experimental conditions explored in this research, we analyzed  
338 sperm swimming in 2D circular-like trajectories confined at a few microns above the  
339 coverslip. The UV flash that sets the initial chemoattractant distribution was focused at  
340 the imaging plane ( $\sim 1\text{-}4 \mu\text{m}$  above the coverslip) (Nosrati et al., 2015). Hence, the  
341 correct diffusion problem corresponds to that of a 2D diffusing regime. We sought to  
342 understand how the stimulus function, which *S. purpuratus* spermatozoa experience  
343 during the accumulation of bound speract throughout their trajectory, influences their  
344 motility response. For this purpose, we computed the spatio-temporal dynamics of the  
345 speract gradient for  $f_1$ ,  $f_2$ ,  $f_3$ ,  $f_4$  and  $f_5$  fibers (**Figure 5a, 5b** and **S4**). and analyzed the  
346 trajectories of spermatozoa swimming in these five distinct speract gradient  
347 configurations (**Figure 5c, S5a** and **S5c**). Moreover, we examined the stimulus function  
348 of individual spermatozoa in response to each of the five speract gradient forms (**Figure**  
349 **5e, S5b, S5d** and **Movie 2**).

350 The model of chemoreception presented in the previous sections (see equations (2)

351 and (3)) predicts a scaling rule for chemotactic responses between *S. purpuratus* and *L.*  
352 *pictus* spermatozoa of  $SF \sim 3$  (equation (4)). The derivatives of the UV-irradiation  
353 profiles shown in **figure 2b** indicate that the  $f_2, f_3$ , and  $f_5$  fibers generate steeper speract  
354 gradients than the  $f_1$  and  $f_4$  fibers.

355 To determine the direction of the chemoattractant concentration gradient, the signal  
356 difference  $\partial c$  between two sampled positions  $\partial r$  must be greater than the noise (**Figure**  
357 **1c**). To test the prediction of the chemoreception model, we computed the local relative  
358 slope of the chemoattractant concentration gradient  $\xi$  detected by single spermatozoa  
359 exposed to a given speract concentration gradient, with  $\xi = \bar{c}^{-1} \frac{\partial c}{\partial r}$  (**Figure 5e**).

360 We found that, in agreement with the chemoreception model, the maximum relative  
361 slope of the chemoattractant concentration gradient  $\xi_{max} = \max(\xi_1, \xi_2, \xi_3, \dots, \xi_n)$   
362 required by *S. purpuratus* spermatozoa to undergo chemotaxis is created when the  $f_2$   
363 and  $f_3$  fibers are employed to generate speract gradients (**Figure 5e**). This relative slope  
364 of the chemoattractant concentration gradients is at least 3 times greater than that  
365 experienced when exposed to the  $f_4$ -generated speract gradient (**Figure 6b**). In  
366 addition, *L. pictus* spermatozoa undergo chemotaxis when exposed to the  $f_4$  speract  
367 gradient, which is 2-3 times smaller than that required by *S. purpuratus* (**Figure 6b**).  
368 These findings support the predicted scaling rule for the detection of the speract  
369 concentration gradient between *L. pictus* and *S. purpuratus* spermatozoa (**Figures 6b**  
370 and **6c**).

371

372 ***The slope of the speract concentration gradient is the critical determinant for the***  
373 ***strength of coupling between the stimulus function and the internal  $Ca^{2+}$  oscillator***

374 Friedrich and Jülicher proposed a general theory that captures the essence of sperm  
375 navigation traversing periodic paths in a non-homogeneous chemoattractant field, in



376 which the sampling of a stimulus function  $S(t)$  is translated by intracellular signaling  
377 into the periodic modulation of the swimming path curvature  $k(t)$  (Friedrich and  
378 Jülicher, 2008, 2007). As a result, the periodic swimming path drifts in a direction that  
379 depends on the internal dynamics of the signaling system. In this theory, the latency of  
380 the intracellular signaling (i.e. the  $[Ca^{2+}]_i$  signal), expressed as the phase shift between  
381  $S(t)$  and  $k(t)$ , is a crucial determinant of the directed looping of the swimming trajectory  
382 up the chemical concentration field (Friedrich and Jülicher, 2009, 2008).

383 Even though this conceptual framework provides insights into the mechanism gov-  
384 erning sperm chemotaxis, it does not explore the scenario where chemoattractants trig-  
385 ger an autonomous  $[Ca^{2+}]_i$  oscillator (Aguilera et al., 2012; Espinal et al., 2011; Wood  
386 et al., 2003), which suggests that sperm chemotaxis might operate in a dynamical space  
387 where two autonomous oscillators, namely the stimulus function and the internal  $Ca^{2+}$   
388 oscillator, reach frequency entrainment (**Figure 6a**).

389 To test the hypothesis that the slope of the speract concentration gradient regulates  
390 the coupling between the stimulus function and the internal  $Ca^{2+}$  oscillator triggered by  
391 speract, we made use of a generic model for coupled phase oscillators (Pikovsky et al.,  
392 2003). In its simplest form, the model describes two phase oscillators of intrinsic fre-  
393 quencies  $\omega_1$  and  $\omega_2$  coupled with a strength  $\gamma$  through the antisymmetric function of  
394 their phase difference  $\phi = \varphi_1 - \varphi_2$ . The time evolution of  $\phi$  then follows an Adler equa-  
395 tion  $d\phi/dt = \Delta\omega - 2\gamma \sin(\phi)$ , which is the leading order description for weakly-coupled  
396 non-linear oscillators. In the present case, the two coupled oscillators are the internal  
397  $Ca^{2+}$  oscillator and the oscillations in the stimulus function induced in spermatozoa  
398 swimming across a speract gradient (**Figure 6a**). The former occurs even for immotile  
399 cells, for which there are no stimulus oscillations under a spatially uniform speract field  
400 (**Figure S6**, and **Movie S8**); while the latter exists under two tested negative controls:

401 cells swimming in Low  $\text{Ca}^{2+}$  and in High  $\text{K}^+$  artificial sea water, both of which inhibit  
402  $\text{Ca}^{2+}$  oscillations (see **Figure 3c, S3** and **Movies S2** and **S3**, respectively).

403 Wood et al., showed that immobilized *S. purpuratus* spermatozoa might experience  
404 spontaneous  $\text{Ca}^{2+}$  transients (Wood et al., 2003) (see **Figure S6**). To provide insight  
405 into the mechanism of sperm chemotaxis we characterized and compared the sponta-  
406 neous vs the speract-induced  $[\text{Ca}^{2+}]_i$  oscillations, and conclude that they are of different  
407 oscillatory nature, hence the spontaneous oscillations do not have a role in sperm chem-  
408 otaxis (see **Figure S9** and section 2.8. *Spontaneous vs speract-induced  $[\text{Ca}^{2+}]_i$  oscil-*  
409 *lations in supplementary material*).

410 There are two immediate predictions from the Adler model: first, there is a minimum  
411 coupling strength necessary for the two oscillators to synchronize ( $\gamma_{min} = \Delta\omega/2$ ). For  
412 weaker coupling (i.e.  $\gamma < \gamma_{min}$ ), the two oscillators run with independent frequencies  
413 and, hence, the phase difference increases monotonically with time; second, and within  
414 the synchronous region (i.e.  $\gamma > \gamma_{min}$ ), the phase difference between the oscillators is  
415 constant and does not take any arbitrary value, but rather follows a simple relation to  
416 the coupling strength ( $\phi_{sync} = \arcsin(\Delta\omega/2\gamma)$ ). **Figure 6d** shows the two regions in the  
417 parameter space given by  $\Delta\omega$  and  $\gamma$ . The boundary between these two regions  
418 corresponds to the condition  $\gamma = \gamma_{min}$  and it delimits what is known as an Arnold's  
419 tongue.

420 We measured the difference in intrinsic frequency by looking at the instantaneous  
421 frequency of the internal  $\text{Ca}^{2+}$  oscillator just before and after the speract gradient is  
422 established. The range of measured  $\Delta\omega$  is shown in **Figure 6d** as a band of accessible  
423 conditions in our experiments (mean of  $\Delta\omega$ , black line; mean  $\pm$  standard deviation,  
424 green dashed lines). If the driving coupling force between the oscillators is the  
425 maximum slope of the speract concentration gradient, i.e.  $\gamma = \zeta_{max}$ , we would expect to

426 find a minimum slope ( $\overline{\zeta_{max}^*}$ ) below which no synchrony is observed. This is indeed  
427 the case as clearly shown in **Figure 6b**, **6e** and **6f** (magenta line). Moreover, and for  
428 cells for which synchronization occurs, the measured phase difference is constrained  
429 by the predicted functional form of  $\phi_{sync} = \phi_{sync}(\Delta\omega, \gamma)$  as can be verified from the  
430 collated data shown in **Figure 6e**, and **6f** within the theoretical estimates (see also  
431 **Figure S7**). Altogether, the excellent agreement of this simple model of coupled phase  
432 oscillators with our data, points to the slope of the speract concentration gradient as the  
433 driving force behind the observed synchronous oscillations and, as a result, for the  
434 chemotactic ability of sea urchin spermatozoa.

## 435 **Discussion**

436 What are the boundary conditions that limit a sperm's capacity to determine the  
437 source of guiding molecules?

438 During their journey, spermatozoa must measure both the concentration and change on  
439 concentration of chemoattractants. Diffusing molecules bind to receptors as discrete  
440 packets arriving randomly over time with statistical fluctuations, imposing a limit on  
441 detection. By following the differences in the mean concentration of chemoattractants,  
442 sampled at a particular time, spermatozoa gather sufficient information to assess the  
443 source of the gradient. However, there is a lower detection limit to determine the direc-  
444 tion of the chemical gradient, which depends on the swimming speed of the sperm, the  
445 sampling time, and as shown in this work, on the steepness of the slope of the chemo-  
446 attractant concentration gradient.

447 For almost three decades, chemotaxis had not been observed for the widely-studied  
448 *S. purpuratus* species under diverse experimental conditions, raising doubts about their  
449 chemotactic capabilities in response to the speract concentration gradients (Cook et al.,  
450 1994; reviewed in Darszon et al., 2008; Guerrero et al., 2010a, 2010b; Solzin et al.,  
451 2004). The observed lack of chemotactic responses by these spermatozoa has been rec-  
452 ognized as an “anomaly” in the field - if we aspire to generalize and interpret findings  
453 in sea urchin spermatozoa to chemotactic responses in other systems, then it is critical  
454 to accommodate and account for any apparent outliers, and not ignore them as incon-  
455 veniently incongruent to the model.

456 To examine whether *S. purpuratus* spermatozoa are able to detect spatial infor-  
457 mation from specific chemoattractant concentration gradient, we use a model of chem-  
458 oreception developed by Berg and Purcell, 1977, which considers the minimal require-  
459 ments needed for a single searcher (i.e. a sperm cell) to gather sufficient information to

460 determine the orientation of a non-uniform concentration field. By considering the dif-  
461 ference between *L. pictus* and *S. purpuratus* spermatozoa in terms of the number of  
462 chemoattractant receptors, receptor pocket effective size, cell size, sampling time, mean  
463 linear velocity, sampling distance, and the local mean and slope of the chemoattractant  
464 concentration gradient, our model predicts that *S. purpuratus* spermatozoa would need  
465 a speract gradient three times steeper than the gradient that drives chemotactic re-  
466 sponses for *L. pictus* spermatozoa. We tested this experimentally by exposing *S. pur-*  
467 *puratus* spermatozoa to various defined speract concentration gradients.

468 We showed that *S. purpuratus* spermatozoa can undergo chemotaxis, but only if the  
469 speract concentration gradients are sufficiently steep, as predicted by the chemorecep-  
470 tion model (i.e. speract gradients that are at in the region of three times steeper than the  
471 speract concentration gradient that drives chemotaxis in *L. pictus* spermatozoa). This  
472 confirms and explains why the shallower speract gradients previously tested are unable  
473 to generate any chemotactic response in *S. purpuratus* spermatozoa (Guerrero et al.,  
474 2010a), despite inducing characteristic “turn and run” motility responses.

475 These findings indicate that the guiding chemical gradient must have a minimum  
476 steepness to elicit sperm chemotaxis, where the signal-to-noise relationship (*SNR*) of  
477 stimulus to the gradient detection mechanism imposes a limit for the chemotactic effi-  
478 ciency. Our results are in agreement with recent theoretical studies by Kromer and col-  
479 leagues, indicating that sperm chemotaxis of marine invertebrates operates optimally  
480 within a boundary defined by the *SNR* of collecting ligands within a chemoattractant  
481 concentration gradient (Kromer et al., 2018). We showed that *SNR* can be tuned by the  
482 steepness of the chemical gradient, where higher *SNR*'s are reached at steeper gradients,  
483 hence increasing the probabilities of locating the source of the gradient.

484

485 The large majority of marine spermatozoa characterized to date, together with many  
486 motile microorganisms, explore their environment via helical swimming paths, where-  
487 upon encountering a surface these helices collapse to circular trajectories. The intrinsic  
488 periodicity of either swimming behavior commonly results in the periodic sampling of  
489 the cell chemical environment with direct implications for their ability to accurately  
490 perform chemotaxis.

491 The periodic sampling of chemoattractants by the sperm flagellum continuously  
492 feeds back to the signaling pathway governing the intracellular  $\text{Ca}^{2+}$  oscillator, hence  
493 providing a potential coupling mechanism for sperm chemotaxis. Indirect evidence for  
494 the existence of a feedback loop operating between the stimulus function and the  $\text{Ca}^{2+}$   
495 oscillator triggered by chemoattractants has been found in *L. pictus*, *A. punctulata* and  
496 *Ciona intestinalis* (ascidian) species, whose spermatozoa show robust chemotactic re-  
497 sponses towards their conspecific chemoattractants (Böhmer et al., 2005; Guerrero et  
498 al., 2010a; Jikeli et al., 2015; Kogiku Shiba et al., 2008).

499 To investigate further the molecular mechanism involved in sperm chemotaxis, we  
500 measured both the stimulus function and the triggered  $[\text{Ca}^{2+}]_i$  oscillations for up to one  
501 thousand *S. purpuratus* spermatozoa exposed to five distinctly-shaped speract concen-  
502 tration gradients. We demonstrate that the steepness of the slope of the chemoattractant  
503 concentration gradient is a major determinant for sperm chemotaxis in *S. purpuratus*  
504 and might be an uncovered feature of sperm chemotaxis in general. A steep slope of  
505 the speract concentration gradient entrains the frequencies of the stimulus function and  
506 the internal  $\text{Ca}^{2+}$  oscillator triggered by the periodic sampling of a non-uniform speract  
507 concentration field. We assessed the transition boundary of the coupling term (the slope  
508 of the speract concentration gradient) for the two oscillators to synchronize and found  
509 it to be very close to the boundary where *S. purpuratus* starts to experience chemotaxis.

510 The agreement of our data with a model of weakly-coupled phase oscillators suggests  
511 that the slope of the speract concentration gradient is the driving force behind the ob-  
512 served synchronous oscillations and, as a result, for the chemotactic ability of sea urchin  
513 spermatozoa.

514 It is not that surprising to find matching of frequencies when dealing with two oscil-  
515 lators coupled through a forcing term. Nonetheless, the boundaries of the “region of  
516 synchrony” are by no means trivial. What is relevant to the former discussion is the  
517 existence of thresholds in the coupling strength, whose experimental calculations agree  
518 with our theoretical predictions based on the chemoreception model. In addition, such  
519 a minimal model for coupled oscillators is also able to predict computed functional  
520 dependencies that are well documented in the literature, i.e. the observed temporal and  
521 frequency lags between the stimulation and signaling responses of the chemoattractant  
522 signaling pathway (Alvarez et al., 2012; Böhmer et al., 2005; Guerrero et al., 2010a;  
523 Kaupp et al., 2003; Nishigaki et al., 2004; Pichlo et al., 2014; K. Shiba et al., 2008;  
524 Strünker et al., 2006; Wood et al., 2007, 2005).

525 Caution must be exercised with the interpretations of the agreement of our data with  
526 such a generic model for coupled phase oscillators, particularly when considering only  
527 a few steps of the oscillatory cycles. The latter is relevant for assessing frequency en-  
528 trainment, which in some cases demands a certain delay before reaching the synchro-  
529 nized state, i.e. when the natural frequencies of the connected oscillators are very dis-  
530 tinct. The chemotactic responses scored in the present study encompass a few steps  
531 (<10) of both the stimulus function and the internal  $\text{Ca}^{2+}$  oscillator triggered by speract  
532 (**Figures S5-S7**). Our data indicate that within the chemotactic regime, frequency en-  
533 trainment of the stimulus function and the internal  $\text{Ca}^{2+}$  oscillator of *S. purpuratus* sper-  
534 matozoa seems to occur almost instantaneously, within the first three oscillatory steps

535 (Figure S7). Such interesting findings can be explained by the proximity of the natural  
536 frequencies of both oscillators (Figure 6d), which may relieve the need for a longer  
537 delay for reaching frequency entrainment. Whether the proximity of the frequencies of  
538 both oscillators is sculpted by the ecological niche where sperm chemotaxis occurs is  
539 an open question, however, a near-instantaneous entrainment would confer obvious  
540 evolutionary advantage under the reproductively competitive conditions of synchro-  
541 nized spawning as undertaken by sea urchins.

542

543 One can further hypothesize about the evolutionary origin of the described differ-  
544 ences in sensitivity to chemoattractant concentration gradients between *S. purpuratus*  
545 and *L. pictus* spermatozoa if we consider their respective ecological reproductive  
546 niches. The turbulent environment where sea urchins reproduce directly impinges on  
547 the dispersion rates of small molecules such as speract, hence, imposing ecological lim-  
548 its that constrain permissive chemoattractant gradient topologies within different hy-  
549 drodynamic regimes. For instance, the reproductive success of *L. pictus*, *S. purpuratus*  
550 and abalone species has been shown to peak at defined hydrodynamic shearing values  
551 (Hussain et al., 2017; Mead and Denny, 1995; Riffell and Zimmer, 2007; Zimmer and  
552 Riffell, 2011). What are the typical values of the chemoattractant gradients encountered  
553 by the different species in their natural habitat? The correct scale to consider when  
554 discussing the small-scale distribution of chemicals in the ocean is the Batchelor scale,  
555  $l_B = (\eta D^2 / \zeta)^{1/4}$ , where  $\eta$  is kinematic viscosity,  $D$  the diffusion coefficient and  $\zeta$  is the  
556 turbulent dissipation rate (Aref et al., 2017; Batchelor et al., 1959). Turbulence stirs  
557 dissolved chemicals in the ocean, stretching and folding them into sheets and filaments  
558 at spatial dimensions down to the Batchelor scale: below  $l_B$  molecular diffusion domi-  
559 nates and chemical gradients are smoothed out.



560 *S. purpuratus* is primarily found in the low intertidal zone. The purple sea urchin  
561 lives in a habitat with strong wave action and areas with shaking aerated water. These  
562 more energetic zones, including tidal channels and breaking waves, generate relatively  
563 high levels of turbulence ( $\zeta \sim 10^{-4} \text{ m}^2\text{s}^{-3}$ ) which lead to somewhat small values of  $l_B$   
564 and, hence, to steep gradients (i.e.  $1/l_B$ ). *L. pictus*, on the contrary, is mostly found at  
565 the edge of or inside kelp beds, well below the low tide mark where the levels of tur-  
566 bulence are much more moderate ( $\zeta \sim 10^{-6} \text{ m}^2\text{s}^{-3}$ ) (Jimenez, 1997; Thorpe, 2007). This  
567 difference in the turbulent kinetic energy dissipation rate has a significant effect on the  
568 spatial dimensions of chemical gradients for sperm chemotaxis present in a particular  
569 habitat. The ratio of  $l_B$  for the different habitats scales as  $l_{B\text{purpuratus}}/l_{B\text{pictus}} \sim (\zeta_{\text{pictus}}/\zeta_{\text{pur-}}$   
570  $\text{puratus})^{1/4} \sim 3$ , which fits considerably well with the relative sensitivity to speract of the  
571 two species. Furthermore, we have shown that *S. purpuratus* spermatozoa experience  
572 chemotaxis toward steeper speract gradients than those that guide *L. pictus* spermato-  
573 zoa, which is also compatible with the distinct chemoattractant gradients they might  
574 naturally encounter during their journey in search of an egg.

## 575 **Materials and Methods**

### 576 *Materials*

577 Artificial seawater (ASW), and Low  $\text{Ca}^{2+}$  ASW were prepared as in Guerrero et al.,  
578 2010, their detailed composition, together with an extended list of other materials is  
579 presented in the **supplementary material**. Caged speract (CS), was prepared as  
580 described previously (Tatsu et al., 2002).

### 581 *Loading of $\text{Ca}^{2+}$ -fluorescent indicator into spermatozoa and microscopy imaging*

582 *S. purpuratus* or *L. pictus* spermatozoa were labeled with fluo-4-AM (as described  
583 in section 2.2. **Loading of  $\text{Ca}^{2+}$ -fluorescent indicator into spermatozoa** in  
584 **supplementary material**), and their swimming behavior was studied at the water-glass  
585 interface on an epifluorescence microscope stage (Eclipse TE-300; Nikon). The cover  
586 slips were covered with poly-HEME to prevent the attachment of the cells to the glass.  
587 Images were collected with a Nikon Plan Fluor 40x 1.3 NA oil-immersion objective.  
588 Temperature was controlled directly on the imaging chamber at a constant 15 °C.  
589 Stroboscopic fluorescence excitation was provided by a Cyan LED synchronized to the  
590 exposure output signal of the iXon camera (2 ms illumination per individual exposure,  
591 observation field of 200 x 200  $\mu\text{m}$ ), the fluorescence cube was set up accordingly (see  
592 **supplementary material**).

### 593 *Image processing and quantification of global changes of spermatozoa number and* 594 *$[\text{Ca}^{2+}]_i$*

595 To study the dynamics of overall sperm motility and  $[\text{Ca}^{2+}]_i$  signals triggered by the  
596 distinct speract gradients, we developed an algorithm that provides an efficient  
597 approach to automatically detect the head of every spermatozoa in every frame of a  
598 given video-microscopy file. A detailed description of the algorithm is provided in the  
599 **supplementary material**.

600 *Computing the dynamics of speract concentration gradients*

601 The dynamics of the chemoattractant gradient was computed using Green's function  
602 of the diffusion equation, considering diffusion in 2D:

$$603 \quad c = f(r, t) = \frac{c_0}{4\pi D(t+t_0)} e^{-r^2/\sigma^2} + c_b, \quad (5)$$

604 Equation (5) for the concentration tells us that the profile has a Gaussian form, where  
605  $D$  is the diffusion coefficient of the chemoattractant,  $c_b$  is the basal concentration of the  
606 chemoattractant,  $t$  is the time interval,  $r$  is the distance to the center of the gradient and  
607  $c_0$  is the initial concentration. The width of the Gaussian is  $\sigma = \sqrt{4D(t+t_0)}$ , and  
608 hence it increases as the square root of time.

609 The speract concentration gradients were generated via the photolysis of 10 nM  
610 caged speract (CS) with a 200 ms UV pulse delivered through each of four different  
611 optical fibers with internal diameters of 0.2, 0.6, 2, and 4 mm (at two different  
612 positions). Light intensity was normalized dividing each point by the sum of all points  
613 of light intensity for each fiber and multiplying it by the fiber potency (measured at the  
614 back focal plane of the objective) in milliwatts (mW) (**Table SII**). Each spatial  
615 distribution of instantaneously-generated speract concentration gradient was computed  
616 by fitting their corresponding normalized spatial distribution of UV light (Residual  
617 standard error:  $2.7 \times 10^{-5}$  on 97 degrees of freedom), considering an uncaging efficiency  
618 of 5-10%, as reported (Tatsu et al., 2002).

619 The diffusion coefficient of speract has not been measured experimentally.  
620 However, the diffusion coefficient of a similar chemoattractant molecule, resact (with  
621 fourteen amino acids), has been reported,  $D_{resact} = 239 \pm 7 \mu\text{m}^2 \text{ s}^{-1}$  (Kashikar et al.,  
622 2012). If we consider that speract is a decapeptide, the 1.4 fold difference in molecular  
623 weight between speract and resact would imply a  $(1.4)^{1/3}$  fold difference in their  
624 diffusion coefficients, which is close to the experimental error reported (Kashikar et al.,

625 2012). For the sake of simplicity, the spatio-temporal dynamics of the distinct  
626 instantaneously generated speract gradients was modeled considering a speract  
627 diffusion coefficient of  $D_{speract} = 240 \mu\text{m}^2 \text{s}^{-1}$ .

### 628 *Computing $[\text{Ca}^{2+}]_i$ dynamics and the stimulus function of single spermatozoa*

629 Spermatozoa were tracked semi-automatically by following the head centroid with  
630 the MtrackJ plugin (Meijering et al., 2012) of ImageJ 1.49u. Single cell  $[\text{Ca}^{2+}]_i$  signals  
631 were computed from the mean value of a 5 x 5 pixel region, centered at each sperm  
632 head along the time. The head position of each spermatozoa  $x$  was used to compute the  
633 mean concentration of speract at  $r$  over each frame. The stimulus function of single  
634 spermatozoa  $S = f(c)$  was computed by solving equation (5), considering both their  
635 swimming trajectories, and the spatio-temporal evolution of a given speract  
636 concentration gradient. The profiles of UV light were used to compute the initial  
637 conditions at  $c(r, t_o)$ .

638 The phase- and temporal-shifts between the time derivative of the stimulus function  
639  $dS/dt$  and the internal  $\text{Ca}^{2+}$  oscillator triggered by speract, were computed from their  
640 normalized cross-correlation function.

641 Programs were written in R statistical software (R Development Core Team, 2016).

### 642 *Chemotactic index (CI)*

643 Each sperm trajectory was smoothened using a moving average filter, with a window  
644 of 60 frames (two seconds approximately) (**Figure 4b and Movie 3**). A linear model  
645 was then fitted to the smoothed trajectory; the corresponding line was forced to go  
646 through the mean point of the smoothed trajectory (orange point in **Figure 4b and**  
647 **Movie 3**). The  $\theta$  angle between red and black vectors was calculated in each frame from  
648 the second 4.5 to 10.

649 The chemotactic index is defined based on the progressive displacement of the  
650 sperm trajectory as  $CI = \frac{|u|\cos\theta - |v|\cos\phi}{|u| + |v|}$ , being  $\phi$  and  $\theta$  the angles between gray and ma-  
651 genta, and red and black vectors, respectively; and  $|v|$  and  $|u|$  the magnitude of the sperm  
652 progressive speed before and after speract uncaging, respectively (**Figure 4b and**  
653 **Movie 3**). The CI considers the sperm displacement before speract uncaging (i.e. un-  
654 stimulated drift movement at 0-3 seconds), and then subtracts it from the speract in-  
655 duced effect (at 3-10 seconds). The CI takes values from -1 (negative chemotaxis) to 1  
656 (positive chemotaxis), being 0 no chemotaxis at all.

#### 657 *Statistical analyses*

658 The normality of the CI distributions, each obtained from *f1* to *f5* speract gradient stim-  
659 uli, was first assessed using the Shapiro-Wilk test; none of them were normal (Gauss-  
660 ian), so each CI distribution was analyzed using non-parametric statistics (**Figure 4d**  
661 **and Movie S7**). The curves obtained from medians of each CI distribution were  
662 smoothed using a moving average filter, with a window of 20 frames (0.6 seconds)  
663 (**Figure 4c**).

664 Data are presented for individual spermatozoa (n) collected from up to three sea  
665 urchins. All statistical tests were performed using R software (R Development Core  
666 Team, 2016). The significance level was set at 95% or 99%.

667

#### 668 **Acknowledgements**

669 The authors thank Dr. Tatsu Yoshiro for providing the caged speract, and Drs. Hermes  
670 Gadêlha, David Smith and Nina Pastor for stimulating discussions and a critical reading  
671 of the manuscript. AG thanks Dr. Manabu Yoshida and Dr. Kaoru Yoshida for feedback  
672 regarding sperm chemotaxis in marine invertebrates, and to the Japan Society for the  
673 Promotion of Science (JSPS invitation fellowship for research in Japan to A.G., short

674 term JSPS/236, ID no. S16172). AD performed part of this work while carrying out a  
675 Sabbatical at the Instituto Gulbenkian de Ciencia (IGC) supported by UNAM/DGAPA  
676 and IGC.

677

#### 678 **Author contributions**

679 A.G., A.D. and I.T. conceived the project; A.G. and V.J.S. performed the  
680 experiments; H.R., A.G., I.T., V.J.S. and M.V. analyzed the data; H.R., A.G., I.T. and  
681 J.C. carried out the mathematical model calculations and wrote the corresponding  
682 section; H.R. and I.T. developed the chemotactic index; A.D., A.G., H.R. and I.T.  
683 participated in the design and drafting of the manuscript; J.C., C.D.W. and C.B.  
684 provided feedback for conceptualization and drafting of the manuscript. All authors  
685 approved the final version of the article.

686

#### 687 **Competing interests**

688 The authors declare that no competing interests exist.

689

#### 690 **Funding**

691 A.D. and A.G. acknowledge grants from the Consejo Nacional de Ciencia y  
692 Tecnología (CONACyT Fronteras 71, Ciencia Básica 252213 and 255914), A.G., A.D.  
693 and C.B to Programa de Apoyo a Proyectos de Investigación e Innovación Tecnológica  
694 UNAM (PAPIIT/DGAPA) (IA202417, IN205516, IN206016, IN215519 and  
695 IN112514). We acknowledge CONACYT and PAPIIT for fellowships to M.V.P. and  
696 H.R.; the Spanish Ministry of Economy and Competitiveness Grants No. FIS2013-  
697 48444-C2-1-P, FIS2016-77692-C2-1- P, the Subprogram Ramón-y-Cajal and the  
698 Ibero-America Program-Santander Universities 2015 (I.T.). M.V.P. had a scholarship

699 from PAPIIT/DGAPA IN206016.

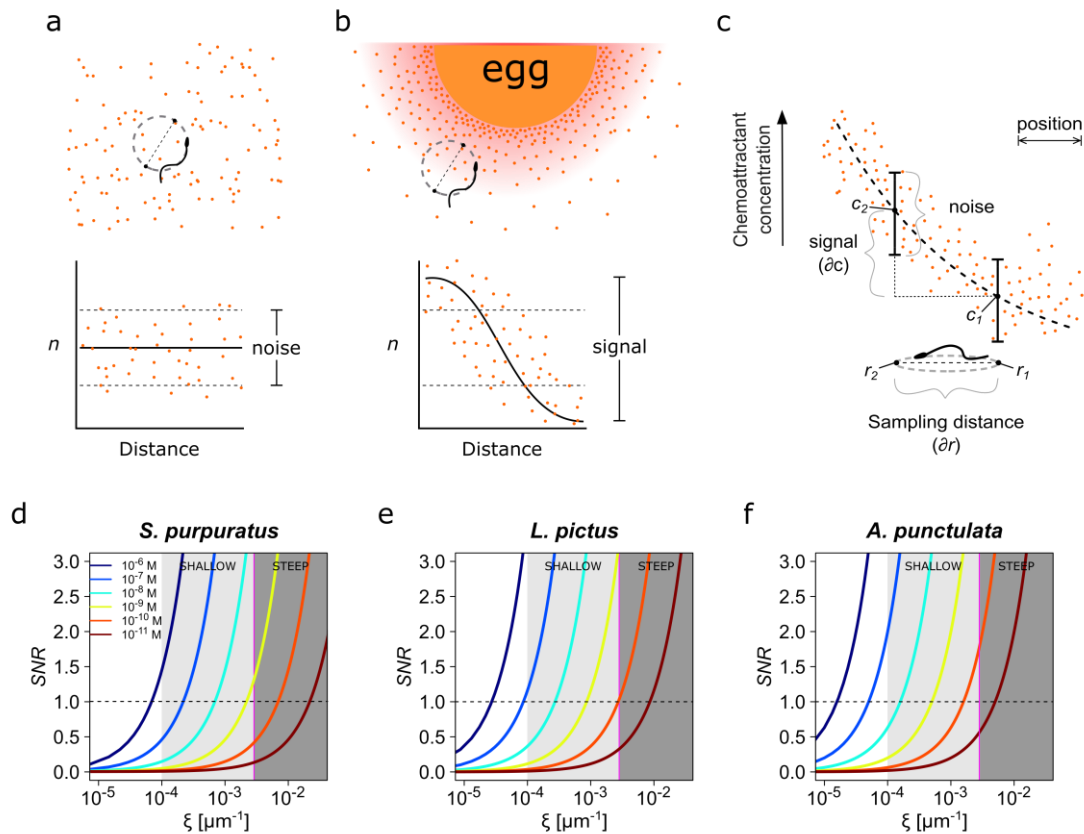

700

701 **Figure 1. Physics of chemoreception. a.** A spermatozoon swimming in an isotropic

702 chemoattractant concentration field, where the number of molecules detected ( $n$ ) is

703 within the noise of detection. **b.** A spermatozoon swimming near to an egg, while

704 chemoattractant molecules are diffusing from its surrounding jelly layer creating a

705 chemoattractant gradient. Note that the signal detected in this case is larger than the

706 detection noise. **c.** The assessment of a chemoattractant concentration gradient requires

707 that the signal difference  $\partial c$  between two sampled positions  $\partial r$  must be greater than

708 the noise. **d-f.** The signal-to-noise ratio in the determination of the chemoattractant

709 gradient  $SNR$  plotted against the relative slope of the chemoattractant concentration

710 gradient in log scale,  $\xi = \bar{c}^{-1} \frac{\partial c}{\partial r}$ , for different chemoattractant concentrations of

711 speract for either *S. purpuratus* (**d**), or *L. pictus* (**e**) spermatozoa, and of resact for *A.*

712 *punctulata* (**f**) spermatozoa (see **Table SI** for the list of parameter values taken in

713 consideration for panels **d-f**). *S. purpuratus* spermatozoa have lower capacity of



714 detection for the same chemoattractant concentrations at a given  $\xi$  than *L. pictus* and *A.*  
715 *punctulata*. The tone of the shaded areas indicates shallow or steep gradient conditions.  
716 The horizontal dotted line represents  $SNR = 1$ ; the vertical magenta line represents  $\xi =$   
717  $2.6 \times 10^{-3} \mu\text{m}^{-1}$ . Colors of the line traces (from blue to brown) indicate distinct  
718 chemoattractant concentrations in the range  $[10^{-6} - 10^{-11} \text{ M}]$ .

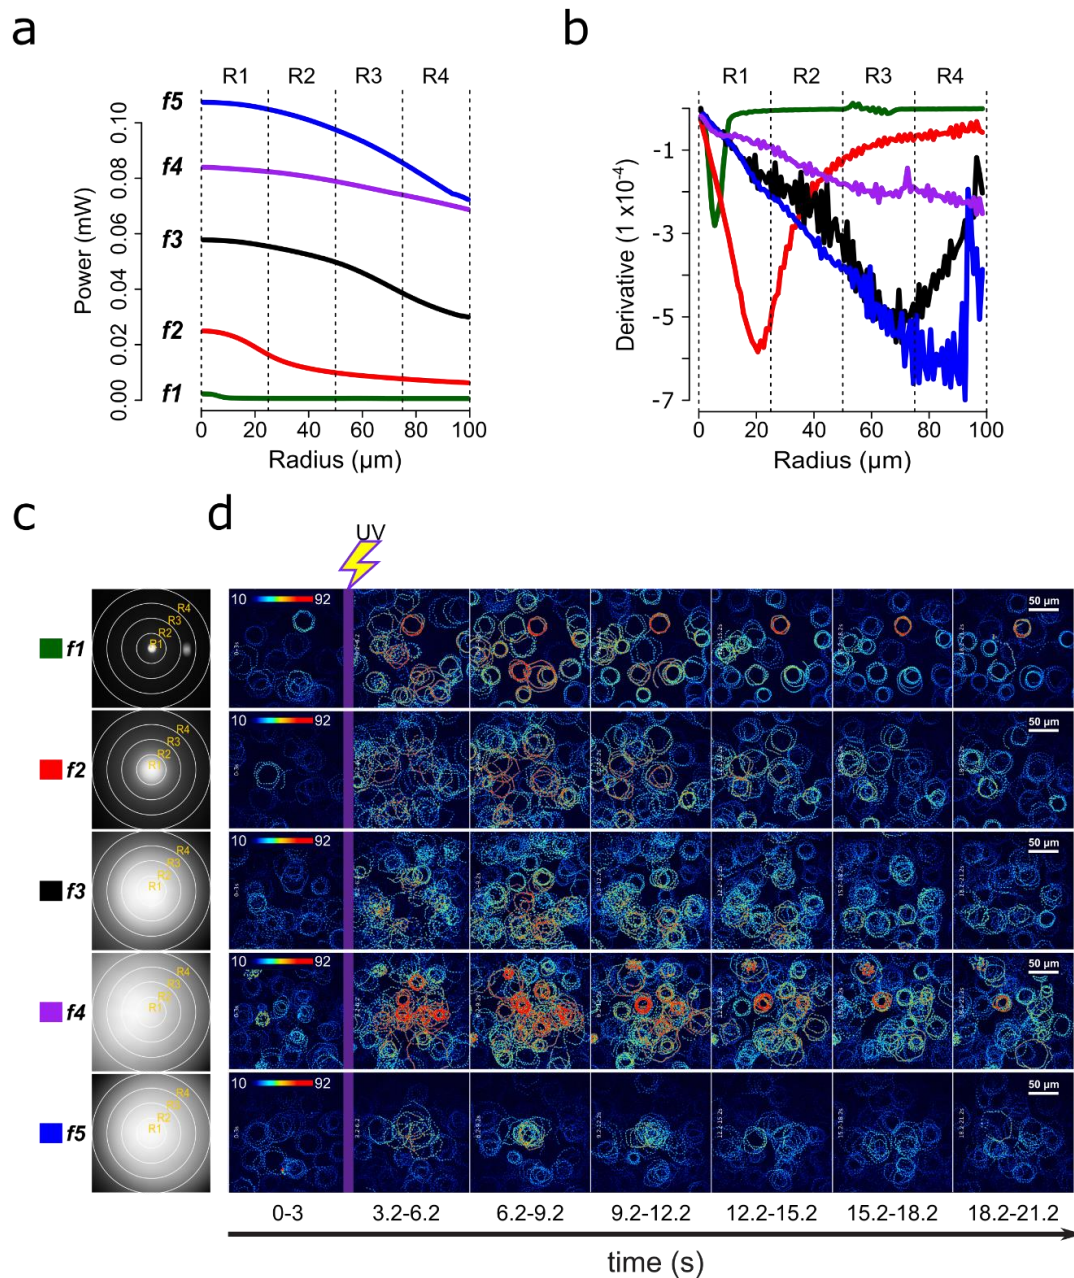

719

720 **Figure 2. Screening of speract concentration gradients.** **a.** Radial profile and its  
 721 derivative (**b**) of the UV light scattered at the glass-liquid interface for each optical fiber  
 722 (*f1-f5*). **c.** Spatial distribution of the UV flash energy for each fiber. **d.** Representative  
 723 motility and  $[\text{Ca}^{2+}]_i$  responses of *S. purpuratus* spermatozoa exposed to different  
 724 concentration gradients of speract. F-F<sub>0</sub> time projections, showing spermatozoa head  
 725 fluorescence at 3 s intervals before and after photoactivation of 10 nM caged speract in  
 726 artificial seawater with 200 ms UV flash. The pseudo-color scale represents the relative

727 fluorescence of fluo-4, a  $[Ca^{2+}]_i$  indicator, showing maximum (red) and minimum  
728 (blue) relative  $[Ca^{2+}]_i$ . Scale bars of 50  $\mu$ m.

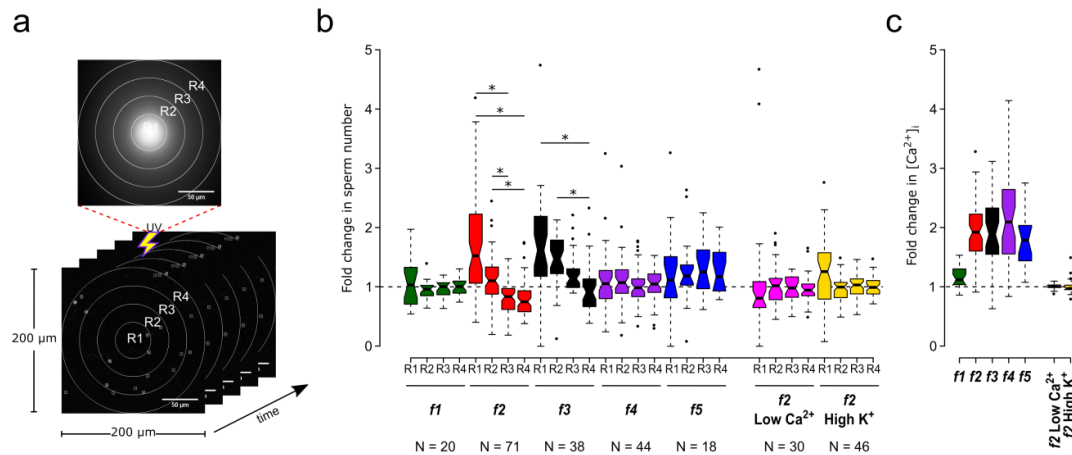

729

730 **Figure 3. Motility and [Ca<sup>2+</sup>]<sub>i</sub> responses of *S. purpuratus* spermatozoa exposed to**

731 **specific concentration gradients of speract. a.** The positions of the sperm heads

732 within the imaging field are automatically assigned to either R1, R2, R3 or R4

733 concentric regions around the centroid of the UV flash intensity distribution. Each ROI

734 was also used to obtain the sperm head fluorescence from the raw video microscopy

735 images (as the mean value of the ROI) (see **Figure S2**). Scale bar of 50 μm. **b.** Fold

736 change in sperm number, defined as the number of spermatozoa at the peak of the

737 response (6 s) relative to the mean number before speract stimulation (0-3 s) (see

738 **Figure S3**). **c.** Relative changes in [Ca<sup>2+</sup>]<sub>i</sub> experienced by spermatozoa at the peak

739 response (6 s) after speract stimulation. Negative controls for spermatozoa chemotaxis

740 are artificial seawater with nominal Ca<sup>2+</sup> (Low Ca<sup>2+</sup>); and artificial seawater with 40

741 mM of K<sup>+</sup> (High K<sup>+</sup>). Both experimental conditions prevent chemotactic responses by

742 inhibiting the Ca<sup>2+</sup> membrane permeability alterations triggered by speract; the former

743 disrupts the Ca<sup>2+</sup> electrochemical gradient, and the later disrupt the K<sup>+</sup> electrochemical

744 gradient required as electromotive force needed to elevate pH<sub>i</sub>, and to open Ca<sup>2+</sup>

745 channels. The central line in each box plot represents the median value, the box denotes

746 the data spread from 25% to 75%, and the whiskers reflect 10–90%. The number of

747 experiments is indicated on the bottom of each experimental condition. We used the

748 same number of experiments for the relative change in  $[Ca^{2+}]_i$  (right panel). \*Statistical  
749 significance,  $p < 0.05$ ; multiple comparison test after Kruskal-Wallis.

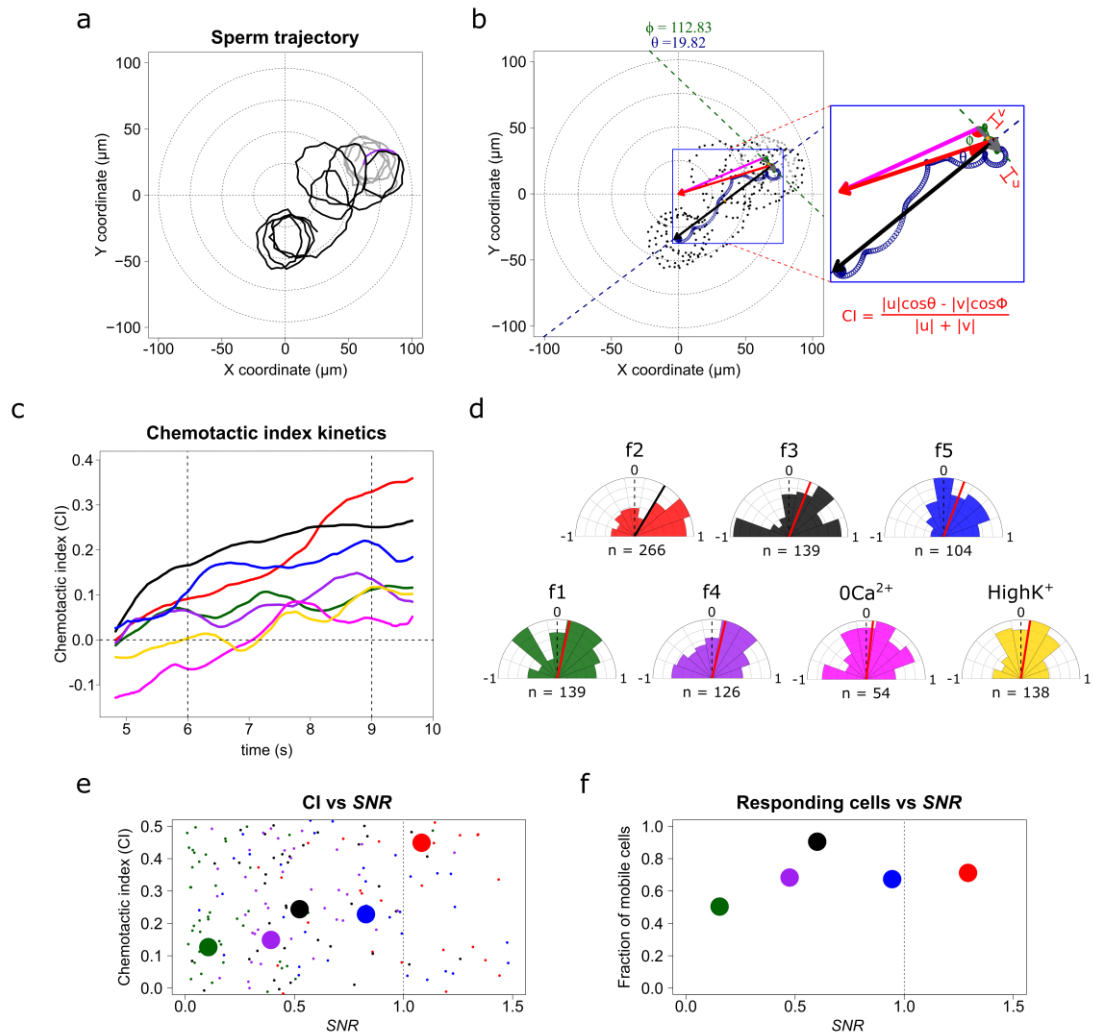

750

751 **Figure 4. *S. purpuratus* spermatozoa selectively experience chemotaxis towards**  
 752 **specific speract gradients. a.** Sperm trajectory before (gray) and after (black) the UV  
 753 irradiation (purple). **b.** Definition of a chemotactic index to score chemotactic re-  
 754 sponses. Dots represent sperm trajectory before (gray) and after (black) UV irradiation.  
 755 Green and blue empty spirals indicate the smoothed trajectory before and after UV ir-  
 756 radiation. Grey and black vectors are the progressive sperm displacement before and  
 757 after stimulation, respectively; and the  $\mathbf{v}$  and  $\mathbf{u}$  vectors are the linear speed before and  
 758 after stimulation; and  $\phi$  and  $\theta$  are the angles to their corresponding reference vectors to  
 759 the center of the imaging field – the highest UV irradiated area, (magenta and red, re-  
 760 spectively). Chemotactic index (CI) is defined as in the inset (see also **Movie 3**). **c.**  
 761 Temporal evolution of the chemotactic index. Functions were calculated from the

762 median obtained from sperm trajectories of each of *f1*, *f2*, *f3*, *f4*, *f5*, *f2-ZeroCa<sup>2+</sup>*, and  
763 *f2-HighK<sup>+</sup>* experimental conditions (**Movie S7**). **d.** Radial histograms of CI computed  
764 at second 9 (vertical dotted line at panel c). Significant differences (*Binomial test*, *p*-  
765 *value* < 0.05) were observed only for *f2*, *f3* and *f5* fibers, compared to controls. *n* rep-  
766 resents the number of individual sperm trajectories analyzed. **e.** CI as a function of the  
767 signal-to-noise ratio (*SNR*). Each parameter was calculated for single cells. Large filled  
768 points represent the median for each gradient condition distribution **f.** Fraction of re-  
769 sponding cells as a function of the *SNR* (spermatozoa whose effective displacement was  
770 above the unstimulated cells). The apparent diffusion of the swimming drifting circle  
771 of unstimulated *S. purpuratus* spermatozoa is  $D_{app} = 9 \pm 3 \mu\text{m}^2 \text{s}^{-1}$  (Friedrich, 2008;  
772 Riedel et al., 2005), here responsive cells were considered by showing a  $D_{app} = 9 \mu\text{m}^2$   
773  $\text{s}^{-1}$ , and were evaluated at second 9.

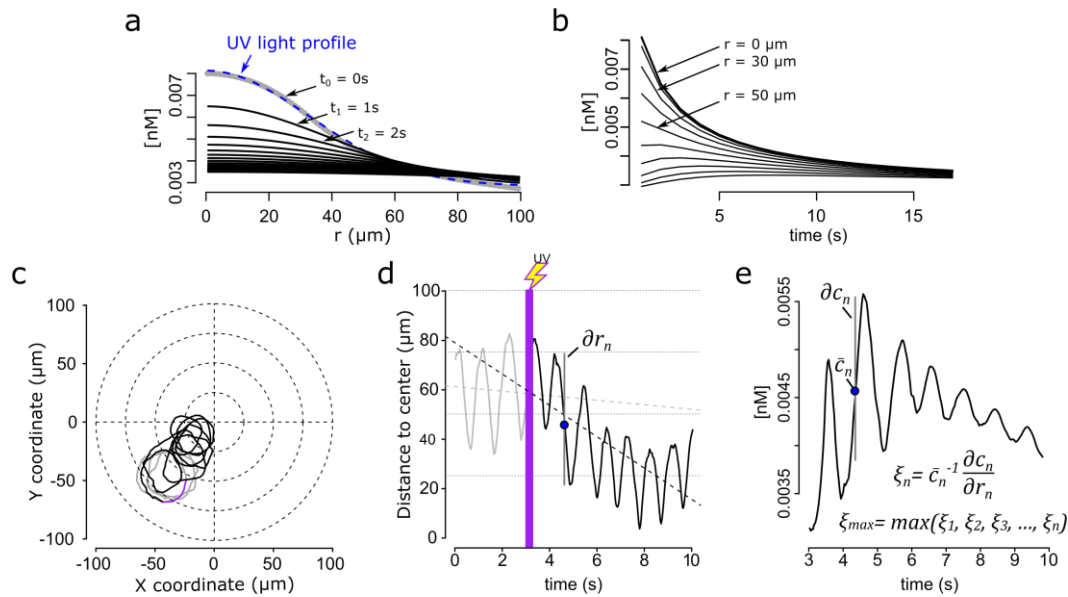

774

775 **Figure 5. Steep speract gradients provoke chemotaxis in *S. purpuratus* spermato-**

776 **zoa. a.** Dynamics of the *f2* speract gradient. The blue dashed line ( $t_0 = 0$  s) corresponds

777 to a Gaussian distribution fitted to the UV light profile and illustrates the putative shape

778 of the instantaneously-generated speract concentration gradient. Solid black lines illus-

779 trate the temporal evolution of the speract concentration field after  $t = 1, 2, 3, \dots, 20$

780 seconds. **b.** Temporal changes in the *f2* speract field computed radially (each  $10 \mu\text{m}$ )

781 from the center of the gradient. **c.** Characteristic motility changes of a *S. purpuratus*

782 spermatozoon exposed to the *f2* speract gradient. Solid lines illustrate its swimming

783 trajectory 3 s before (gray), during UV flash (purple) and 6 s after (black) speract ex-

784 posure. **d.** Spermatozoa head distance to the source of the speract gradient versus time,

785 calculated from sperm trajectory in **c**. **e.** Stimulus function computed from the swim-

786 ming behavior of the spermatozoon in **c**, considering the dynamics of **a** and **b**.

787



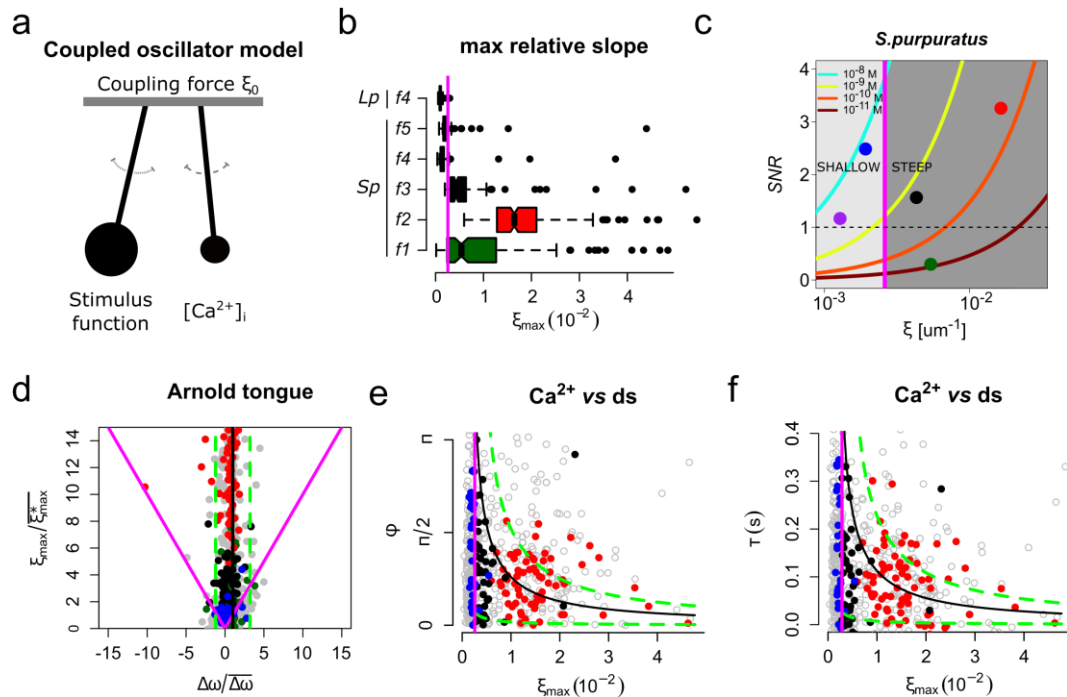

788

789 **Figure 6. The slope of the speract concentration gradient generates a frequency-**  
 790 **locking phenomenon between the stimulus function and the internal  $\text{Ca}^{2+}$  oscilla-**  
 791 **tor triggered by speract. a.** Coupled oscillator model. Each sperm has two independ-  
 792 ent oscillators: i) stimulus function and ii)  $[\text{Ca}^{2+}]_i$ , which can be coupled through a forc-  
 793 ing term that connects them, in our case the slope of the chemoattractant concentration  
 794 gradient ( $\zeta_0$ ). **b.** Maximum relative slopes ( $\zeta_{max}$ ) of the chemoattractant concentration  
 795 gradient experienced by *S. purpuratus* (*Sp*) spermatozoa when exposed to *f1*, *f2*, *f3*, *f4*,  
 796 *f5* speract gradients. The maximum relative slopes of the chemoattractant concentration  
 797 gradient experienced by *L. pictus* spermatozoa (*Lp*) towards *f4* experimental regime are  
 798 also shown. Note that  $\zeta_{max}$  for *f2*, *f3*, and *f5*, are up to 2-3 times greater than in *f4*, re-  
 799 gardless of the species. **c.** Experimental signal-to-noise ratios (*SNR*) regimes experi-  
 800 enced by spermatozoa swimming in different gradient conditions. Note that only *f2*, *f3*  
 801 and *f5* have higher *SNR*, compared to other gradient conditions, for which stochastic  
 802 fluctuations mask the signal. This *SNR* calculation assumes a 10% of speract uncaging.  
 803 The maximum relative slopes ( $\zeta$ ) are shown in log scale **d.** Arnold's tongue indicating

804 the difference in intrinsic frequency of the internal  $\text{Ca}^{2+}$  oscillator of *S. purpuratus* sper-  
805 matozoa, just before and after the speract gradient exposure. **e.** Phase difference be-  
806 tween the time derivative of the stimulus function and the internal  $\text{Ca}^{2+}$  oscillator of *S.*  
807 *purpuratus* spermatozoa, obtained by computing the cross-correlation function between  
808 both time series (**Figure S7**). **f.** Phase difference between the time derivative of the  
809 stimulus function and the internal  $\text{Ca}^{2+}$  oscillator of *S. purpuratus* spermatozoa ex-  
810 pressed in temporal delays. **d-f.** Gray points represent the collated data of all *f1*, *f2*, *f3*,  
811 *f4*, *f5* experimental regimes. Red, black and blue points indicate chemotactic spermato-  
812 zoa ( $\text{CI} > 0$  at second 3 after UV flash), located in R3, and R4 regions just before the  
813 speract gradient is established under *f2*, *f3* and *f5* experimental regimes, respectively.  
814 Magenta lines represent the transition boundary ( $\gamma_{min} = \overline{\xi_{max}^*} \sim 2.6 \times 10^{-3} \mu\text{m}^{-1}$ , see also  
815 **Figure 1d-f**) below which no synchrony is observed, obtained from the theoretical es-  
816 timates (black curves, mean of  $\Delta\omega$ ) of panels **e** and **f**. Green dashed lines indicate con-  
817 fidence intervals (mean  $\pm$  standard deviation).

818 **Table I. Sperm accumulation responses triggered by different speract gradients.**

| <b>Optical fiber</b> | <b>Sperm accumulation at the central regions of the imaging field</b> | <b>Sperm depleted of distal regions of the imaging field</b> | <b>[Ca<sup>2+</sup>]<sub>i</sub> rise (fold)</b> |
|----------------------|-----------------------------------------------------------------------|--------------------------------------------------------------|--------------------------------------------------|
| <i>f1</i>            | No                                                                    | No                                                           | < 2                                              |
| <i>f2</i>            | R1 and R2                                                             | R3 and R4                                                    | > 2                                              |
| <i>f3</i>            | R1, R2 and R3                                                         | R4                                                           | > 2                                              |
| <i>f4</i>            | No                                                                    | No                                                           | > 2                                              |
| <i>f5</i>            | No                                                                    | No                                                           | ~ 2                                              |

819

820 Accumulation responses were evaluated at second 6, i.e. 3 seconds after photo-libera-

821 tion of speract by a 200 ms UV flash.

822 <https://www.dropbox.com/s/oe0mnc8j5r6518s/Movie%201.avi?dl=0>

823 **Movie 1. Typical motility and  $\text{Ca}^{2+}$  responses of *S. purpuratus* spermatozoa to-**  
824 **wards an  $f_2$ -generated speract concentration gradient.** Spermatozoa swimming in  
825 artificial sea water containing 10 nM caged speract, 3 s before and 5 s after 200 ms UV  
826 irradiation. An optical fiber of 0.6 mm internal diameter ( $f_2$ ) was used for the UV light  
827 path to generate the speract concentration gradient. Real time: 30.8 frames  $\text{s}^{-1}$ ,  
828 40x/1.3NA oil-immersion objective. Note that spermatozoa located at R2, R3 and R4  
829 regions prior to speract exposure swim up the speract concentration gradient, towards  
830 the center of the imaging field. The pseudo-color scale represents the relative fluores-  
831 cence of fluo-4, a  $\text{Ca}^{2+}$  indicator, showing maximum (red) and minimum (blue) relative  
832  $[\text{Ca}^{2+}]_i$ . Six *S. purpuratus* spermatozoa were manually tracked for visualization pur-  
833 poses. Scale bar of 50  $\mu\text{m}$ .

834 <https://www.dropbox.com/s/k67113x0fz2u4tw/Movie2.2.avi?dl=0>

835 **Movie 2. Sperm trajectory analysis and stimulus function.** Single-cell analysis was  
836 performed for approximately 1000 sperm trajectories for the different speract gradients  
837 (*f1-f5* and negative controls). The sperm trajectory shown here is representative of a  
838 chemotactic sperm. This analysis was implemented after speract uncaging at 3 seconds  
839 (from 3.2 - 10 seconds). Trajectory before, after and during the 200 ms UV flash is  
840 shown in gray, black and purple, respectively.

841 <https://www.dropbox.com/s/tbqsyjnnq7ilbwm/Movie%203.1.avi?dl=0>

842 **Movie 3. Sperm trajectory analysis and chemotactic index (CI).** Single-cell analysis  
843 was performed for approximately 1000 sperm trajectories from the different speract  
844 gradients (*f1-f5* and negative controls). Angle  $\phi$  is calculated just once and is always  
845 the same for each sperm trajectory. Angle  $\theta$  is calculated per frame of the video for  
846 each sperm trajectory, resulting in the chemotactic index kinetics for each sperm tra-  
847 jectory (right panel). The sperm trajectory shown here represents a chemotactic sperm.  
848 This analysis was implemented from 4.5 seconds to 10 seconds. Speract uncaging was  
849 induced at 3 seconds. Trajectory before and after speract release is shown in gray and  
850 black dots, respectively.

## 851 References

- 852 Aguilera LU, Galindo BE, Sánchez D, Santillán M. 2012. What Is the Core Oscillator  
853 in the Sperm-Activated Pathway of the Strongylocentrotus purpuratus Sperm  
854 Flagellum? *Biophys J* **102**:2481–2488. doi:10.1016/j.bpj.2012.03.075
- 855 Alvarez L, Dai L, Friedrich BM, Kashikar ND, Gregor I, Pascal R, Kaupp UB. 2012.  
856 The rate of change in Ca<sup>2+</sup> concentration controls sperm chemotaxis. *J Cell*  
857 *Biol* **196**:653–663. doi:10.1083/jcb.201106096
- 858 Amselem G, Theves M, Bae A, Beta C, Bodenschatz E. 2012. Control Parameter  
859 Description of Eukaryotic Chemotaxis. *Phys Rev Lett* **109**:108103.  
860 doi:10.1103/PhysRevLett.109.108103
- 861 Aref H, Blake JR, Budišić M, Cardoso SSS, Cartwright JHE, Clercx HJH, El Omari  
862 K, Feudel U, Golestanian R, Gouillart E, van Heijst GF, Krasnopolskaya TS, Le  
863 Guer Y, MacKay RS, Meleshko V V., Metcalfe G, Mezić I, de Moura APS, Piro  
864 O, Speetjens MFM, Sturman R, Thiffeault J-L, Tuval I. 2017. Frontiers of  
865 chaotic advection. *Rev Mod Phys* **89**:025007.  
866 doi:10.1103/RevModPhys.89.025007
- 867 Batchelor GK, Howells ID, Townsend AA. 1959. Small-scale variation of convected  
868 quantities like temperature in turbulent fluid Part 2. The case of large  
869 conductivity. *J Fluid Mech* **5**:134. doi:10.1017/S0022112059000106
- 870 Berg HC, Purcell EM. 1977. Physics of chemoreception. *Biophys J* **20**:193–219.  
871 doi:10.1016/S0006-3495(77)85544-6
- 872 Böhmer M, Van Q, Weyand I, Hagen V, Beyermann M, Matsumoto M, Hoshi M,  
873 Hildebrand E, Kaupp UB, Bohmer M, Van Q, Weyand I, Hagen V, Beyermann  
874 M, Matsumoto M, Hoshi M, Hildebrand E, Kaupp UB. 2005. Ca<sup>2+</sup> spikes in the  
875 flagellum control chemotactic behavior of sperm. *EMBO J* **24**:2741–52.  
876 doi:10.1038/sj.emboj.7600744
- 877 Brokaw CJ. 1979. Calcium-induced asymmetrical beating of triton-demembrated  
878 sea urchin sperm flagella. *J Cell Biol* **82**:401–411. doi:10.1083/jcb.82.2.401
- 879 Cook SP, Brokaw CJ, Muller CH, Babcock DF. 1994. Sperm Chemotaxis: Egg  
880 Peptides Control Cytosolic Calcium to Regulate Flagellar Responses. *Dev Biol*  
881 **165**:10–19. doi:10.1006/dbio.1994.1229
- 882 Darszon A, Guerrero A, Galindo BE, Nishigaki T, Wood CD. 2008. Sperm-activating  
883 peptides in the regulation of ion fluxes, signal transduction and motility. *Int J*  
884 *Dev Biol* **52**:595–606. doi:10.1387/ijdb.072550ad
- 885 Espinal J, Aldana M, Guerrero A, Wood C, Darszon A, Martínez-Mekler G. 2011.  
886 Discrete Dynamics Model for the Sperm-Activated Ca<sup>2+</sup> Signaling Network  
887 Relevant to Sperm Motility. *PLoS One* **6**:e22619.  
888 doi:10.1371/journal.pone.0022619
- 889 Friedrich BM. 2008. Search along persistent random walks. *Phys Biol* **5**:026007.  
890 doi:10.1088/1478-3975/5/2/026007
- 891 Friedrich BM, Jülicher F. 2009. Steering Chiral Swimmers along Noisy Helical Paths.  
892 *Phys Rev Lett* **103**:068102. doi:10.1103/PhysRevLett.103.068102
- 893 Friedrich BM, Jülicher F. 2008. The stochastic dance of circling sperm cells: sperm  
894 chemotaxis in the plane. *New J Phys* **10**:123025. doi:10.1088/1367-  
895 2630/10/12/123025
- 896 Friedrich BM, Jülicher F. 2007. Chemotaxis of sperm cells. *Proc Natl Acad Sci*  
897 **104**:13256–13261. doi:10.1073/pnas.0703530104
- 898 Guerrero A, Nishigaki T, Carneiro J, Tatsu Y, Wood CD, Darszon A, Yoshiro T,  
899 Wood CD, Darszon A. 2010a. Tuning sperm chemotaxis by calcium burst

- 900 timing. *Dev Biol* **344**:52–65. doi:10.1016/j.ydbio.2010.04.013
- 901 Guerrero A, Wood CD, Nishigaki T, Carneiro J, Darszon A. 2010b. Tuning sperm  
902 chemotaxis. *Biochem Soc Trans* **38**:1270–1274. doi:10.1042/BST0381270
- 903 Hansbrough JR, Garbers DL, Garbers L. 1981. Speract. Purification and  
904 characterization of a peptide associated with eggs that activates spermatozoa. *J*  
905 *Biol Chem* **256**:1447–52.
- 906 Hussain YH, Sadilek M, Salad S, Zimmer RK, Riffell JA. 2017. Individual female  
907 differences in chemoattractant production change the scale of sea urchin gamete  
908 interactions. *Dev Biol* **422**:186–197. doi:10.1016/j.ydbio.2017.01.006
- 909 Jikeli JF, Alvarez L, Friedrich BM, Wilson LG, Pascal R, Colin R, Pichlo M,  
910 Rennhack A, Brenker C, Kaupp UB. 2015. Sperm navigation along helical paths  
911 in 3D chemoattractant landscapes. *Nat Commun* **6**:7985.  
912 doi:10.1038/ncomms8985
- 913 Jimenez J. 1997. Oceanic turbulence at millimeter scales. *Sci Mar* **61**:47–56.
- 914 Kashikar ND, Alvarez L, Seifert R, Gregor I, Jäckle O, Beyermann M, Krause E,  
915 Kaupp UB, Benjamin Kaupp U. 2012. Temporal sampling, resetting, and  
916 adaptation orchestrate gradient sensing in sperm. *J Cell Biol* **198**:1075–1091.  
917 doi:10.1083/jcb.201204024
- 918 Kaupp UB, Solzin J, Hildebrand E, Brown JE, Helbig A, Hagen V, Beyermann M,  
919 Pampaloni F, Weyand I. 2003. The signal flow and motor response controlling  
920 chemotaxis of sea urchin sperm. *Nat Cell Biol* **5**:109–117. doi:10.1038/ncb915
- 921 Kaupp UBB. 2012. 100 years of sperm chemotaxis. *J Gen Physiol* **140**:583–586.  
922 doi:10.1085/jgp.201210902
- 923 Kromer JA, Märcker S, Lange S, Baier C, Friedrich BM. 2018. Decision making  
924 improves sperm chemotaxis in the presence of noise. *PLOS Comput Biol*  
925 **14**:e1006109. doi:10.1371/journal.pcbi.1006109
- 926 Lazova MD, Ahmed T, Bellomo D, Stocker R, Shimizu TS. 2011. Response rescaling  
927 in bacterial chemotaxis. *Proc Natl Acad Sci* **108**:13870–13875.  
928 doi:10.1073/pnas.1108608108
- 929 Lillie FR. 1913. The mechanism of fertilization. *Science (80- )* **38**:524–528.  
930 doi:10.1126/science.38.980.524
- 931 Lotterhos K, Levitan D, Traits G. 2010. Gamete release and spawning behavior in  
932 broadcast spawning marine invertebrates. *Evol Prim Sex Characters Anim* 99–  
933 120.
- 934 Mead KS, Denny MW. 1995. The effects of hydrodynamic shear stress on  
935 fertilization and early development of the purple sea urchin *Strongylocentrotus*  
936 *purpuratus*. *Biol Bull* **188**:46–56. doi:10.2307/1542066
- 937 Meijering E, Dzyubachyk O, Smal I. 2012. Methods for Cell and Particle Tracking.  
938 pp. 183–200. doi:10.1016/B978-0-12-391857-4.00009-4
- 939 Miller RL. 1985. Sperm Chemo-Oriented in the Metazoa In: Metz CB, Monroy A,  
940 editors. *Biology of Fertilization*. New York: Academic Press. pp. 275–337.
- 941 Mizuno K, Shiba K, Yaguchi J, Shibata D, Yaguchi S, Prulière G, Chenevert J, Inaba  
942 K. 2017. Calaxin establishes basal body orientation and coordinates movement  
943 of monocilia in sea urchin embryos. *Sci Rep* **7**:1–10. doi:10.1038/s41598-017-  
944 10822-z
- 945 Nishigaki T, Darszon A. 2000. Real-Time Measurements of the Interactions between  
946 Fluorescent Speract and Its Sperm Receptor. *Dev Biol* **223**:17–26.  
947 doi:10.1006/dbio.2000.9734
- 948 Nishigaki T, Wood CD, Tatsu Y, Yumoto N, Furuta T, Elias D, Shiba K, Baba SA,  
949 Darszon A. 2004. A sea urchin egg jelly peptide induces a cGMP-mediated



- 950 decrease in sperm intracellular Ca(2+) before its increase. *Dev Biol* **272**:376–88.  
951 doi:10.1016/j.ydbio.2004.04.035
- 952 Nishigaki T, Zamudio FZ, Possani LD, Darszon A. 2001. Time-resolved sperm  
953 responses to an egg peptide measured by stopped-flow fluorometry. *Biochem*  
954 *Biophys Res Commun* **284**:531–5. doi:10.1006/bbrc.2001.5000
- 955 Nosrati R, Driouchi A, Yip CM, Sinton D. 2015. Two-dimensional slither swimming  
956 of sperm within a micrometre of a surface. *Nat Commun* **6**.  
957 doi:10.1038/ncomms9703
- 958 Pfeffer W. 1884. Locomotorische Richtungsbewegungen durch chemische Reize.  
959 *Untersuchungen aus dem Bot Inst zu Tübingen*.
- 960 Pichlo M, Bungert-Plümke S, Weyand I, Seifert R, Bönigk W, Strünker T, Kashikar  
961 ND, Goodwin N, Müller A, Körschen HG, Collienne U, Pelzer P, Van Q,  
962 Enderlein J, Klemm C, Krause E, Trötschel C, Poetsch A, Kremmer E, Kaupp  
963 UB. 2014. High density and ligand affinity confer ultrasensitive signal detection  
964 by a guanylyl cyclase chemoreceptor. *J Cell Biol* **206**:541–557.  
965 doi:10.1083/jcb.201402027
- 966 Pikovsky A, Rosenblum M, Kurths J. 2003. Synchronization: A Universal Concept in  
967 Nonlinear Sciences. *Cambridge Nonlinear Sci Ser 12* 432.  
968 doi:10.1063/1.1554136
- 969 R Development Core Team. 2016. R: A language and environment for statistical  
970 computing. Vienna, Austria: R Foundation for Statistical Computing.
- 971 Riedel IH, Kruse K, Howard J. 2005. Biophysics: A self-organized vortex array of  
972 hydrodynamically entrained sperm cells. *Science (80- )* **309**:300–303.  
973 doi:10.1126/science.1110329
- 974 Riffell J a, Zimmer RK. 2007. Sex and flow: the consequences of fluid shear for  
975 sperm egg interactions. *J Exp Biol* **210**:3644–3660. doi:10.1242/jeb.008516
- 976 Shiba Kogiku, Baba SA, Inoue T, Yoshida M. 2008. Ca<sup>2+</sup> bursts occur around a local  
977 minimal concentration of attractant and trigger sperm chemotactic response.  
978 *Proc Natl Acad Sci U S A* **105**:19312–7. doi:10.1073/pnas.0808580105
- 979 Shiba K., Baba SA, Inoue T, Yoshida M. 2008. Ca<sup>2+</sup> bursts occur around a local  
980 minimal concentration of attractant and trigger sperm chemotactic response.  
981 *Proc Natl Acad Sci* **105**:19312–19317. doi:10.1073/pnas.0808580105
- 982 Solzin J, Helbig A, Van Q, Brown JE, Hildebrand E, Weyand I, Kaupp UB. 2004.  
983 Revisiting the role of H<sup>+</sup> in chemotactic signaling of sperm. *J Gen Physiol*  
984 **124**:115–24. doi:10.1085/jgp.200409030
- 985 Strünker T, Alvarez L, Kaupp UB. 2015. At the physical limit - chemosensation in  
986 sperm. *Curr Opin Neurobiol* **34**:110–116. doi:10.1016/j.conb.2015.02.007
- 987 Strünker T, Weyand I, Bönigk W, Van Q, Loogen A, Brown JE, Kashikar N, Hagen  
988 V, Krause E, Kaupp UB. 2006. A K<sup>+</sup>-selective cGMP-gated ion channel controls  
989 chemosensation of sperm. *Nat Cell Biol* **8**:1149–1154. doi:10.1038/ncb1473
- 990 Suzuki N. 1995. Structure, function and biosynthesis of sperm-activating peptides and  
991 fucose sulfate glycoconjugate in the extracellular coat of sea urchin eggs.  
992 *ZoologSci* **12**:13–27.
- 993 Tatsu Y, Nishigaki T, Darszon A, Yumoto N. 2002. A caged sperm-activating peptide  
994 that has a photocleavable protecting group on the backbone amide. *FEBS Lett*  
995 **525**:20–24. doi:10.1016/S0014-5793(02)03000-4
- 996 Thorpe S. 2007. An introduction to ocean turbulence. Cambridge University Press.
- 997 Wood CD, Darszon A, Whitaker M. 2003. Speract induces calcium oscillations in the  
998 sperm tail. *J Cell Biol* **161**:89–101. doi:10.1083/jcb.200212053
- 999 Wood CD, Guerrero A, Priego-Espinosa DA, Martínez-Mekler G, Carneiro J,

- 1000 Darszon A. 2015. Sea urchin sperm chemotaxis, Flagellar Mechanics and Sperm  
1001 Guidance. Bentham Science Publishers. doi:10.2174/97816810812811150101  
1002 Wood CD, Nishigaki T, Furuta T, Baba SA, Darszon A. 2005. Real-time analysis of  
1003 the role of Ca<sup>2+</sup> in flagellar movement and motility in single sea urchin sperm.  
1004 *J Cell Biol* **169**:725–731. doi:10.1083/jcb.200411001  
1005 Wood CD, Nishigaki T, Tatsu Y, Yumoto N, Baba SA, Whitaker M, Darszon A.  
1006 2007. Altering the speract-induced ion permeability changes that generate  
1007 flagellar Ca<sup>2+</sup> spikes regulates their kinetics and sea urchin sperm motility. *Dev*  
1008 *Biol* **306**:525–537. doi:10.1016/j.ydbio.2007.03.036  
1009 Yoshida M, Yoshida K. 2011. Sperm chemotaxis and regulation of flagellar  
1010 movement by Ca<sup>2+</sup>. *Mol Hum Reprod* **17**:457–465. doi:10.1093/molehr/gar041  
1011 Zimmer RK, Riffell JA. 2011. Sperm chemotaxis, fluid shear, and the evolution of  
1012 sexual reproduction. *Proc Natl Acad Sci* **108**:13200–13205.  
1013 doi:10.1073/pnas.1018666108

1014 **Supplementary material. Sperm chemotaxis is driven by the slope of**  
1015 **the chemoattractant concentration field.**

1016

1017 **1. Theory**

1018 *1.1. On the estimate of maximal chemoattractant absorption*

1019 Berg and Purcell (1977) derived a simple expression for the mean chemoattractant  
1020 binding and adsorption flux by a cell in the steady-state, denoted  $J$ :

1021 
$$J = 4\pi D a \bar{c} \frac{N}{N + \pi a/s} = J_{max} \frac{N}{N + \pi a/s}, \quad (\text{S1})$$

1022 where  $D$  is the diffusion coefficient of the chemoattractant;  $a$  is the radius of the  
1023 cell;  $\bar{c}$  is the mean concentration of the chemoattractant;  $N$  is the number of receptors  
1024 on the membrane of the cell;  $s$  is the effective radius of the receptor, assumed to be  
1025 disk-like on the cell surface and binding to chemoattractant molecules with high  
1026 affinity;  $J_{max} = 4\pi D a \bar{c}$ , which is the maximal flux of chemoattractant that a cell in the  
1027 steady-state can experience; and the receptor term  $\frac{N}{N + \pi a/s}$  is the probability that a  
1028 molecule that has collided with the cell will find a receptor (Berg and Purcell, 1977).

1029 The receptor term arises from the matching of two distinct limits: for a low number  
1030 of receptors, the flux into independent patches leads to an overall diffusive flux into the  
1031 sphere that is linear with the number of receptors. In the opposite limit of large surface  
1032 coverage, the "interactions between the effects of adjacent receptors" leads indeed to  
1033 the saturation of chemoreception. The expression implies that for  $N \gg \pi a/s =$   
1034  $N_{1/2}$  the flux of chemoattractant adsorption becomes  $J \cong J_{max}$ , which means that  
1035 coverage of only a small fraction of the cell surface by the receptors may lead to  
1036 maximal flux. The flux becomes practically independent of the number of receptors,  
1037 proportional to the concentration of the chemoattractant and limited by its diffusion,

1038 when receptor density is sufficiently large. For a given chemoattractant concentration  
1039 the half maximal flux ( $J = \frac{1}{2}J_{max}$ ) is reached when the number of receptors is  
1040  $N = N_{1/2} = \pi a/s$ .

1041 It is worth getting a rough estimate of the number of receptors required for a maximal  
1042 influx of chemoattractant, in the specific case of spermatozoa by calculating  $N_{1/2}$ ,  
1043 assuming a spherical cell with a surface area equivalent to that of the actual flagella. In  
1044 the case of *S. purpuratus* sperm, the flagellar width  $h \cong 0.2 \mu\text{m}$ , and length  $L \cong 40 \mu\text{m}$   
1045 that would give us an approximate surface area  $A \sim 25 \mu\text{m}^2$  or an equivalent spherical  
1046 radius  $a_e \sim 1.4 \mu\text{m}$  and, hence, a  $J_{max} \cong 0.1J_{max}^{sph}$ , where  $J_{max}^{sph}$  represents the maximal  
1047 influx of chemoattractants for the spherical cell. The factor 0.1 relating the maximal  
1048 flux  $J_{max}$  in a cylindrical flagellum and  $J_{max}^{sph}$  in a spherical cell, arises by recalling that  
1049 the expression for  $J_{max}$  in equation (S1).

1050 The later stems from an analogy with electrostatics such that the total current  
1051 depends on the electrical capacitance  $C$  of the conducting material and, in particular,  
1052 on the geometrical arrangement. The capacitance of a simple spherical conductor equals  
1053 the radius  $a$  of the sphere but more generally we have  $J_{max} = 4\pi CD\bar{c}$  (Berg and  
1054 Purcell, 1977).

1055 Note that the spherical geometry is a first order approximation, which has been  
1056 extremely useful and successful in the past in shedding light on many problems with  
1057 more complex geometries. This includes the first estimate of diffusive fluxes in this  
1058 same chemotaxis problem (as Berg and Purcell showed in 1977). Here, we have  
1059 followed the same principle of "minimal modelling" that captures the main physics but  
1060 that, at the same time, allows for simple characterization of the relevant parameters (e.g.  
1061 the dependence with the number of receptors).

1062 A more accurate computation can be obtained by considering the nearly cylindrical

1063 shape of the flagellum. The capacitance of a finite cylinder can be obtained as a series  
1064 expansion in the logarithm of the cylinder aspect ratio  $\Lambda = \ln(L/h)$  (Maxwell, 1877)  
1065 and, to a second order in  $1/\Lambda$ , and is given by the following expression:

$$1066 \quad C = \frac{2\pi L}{\Lambda} \left[ 1 + \frac{1}{\Lambda} (1 - \ln 2) + \frac{1}{\Lambda^2} \left\{ 1 + (1 - \ln 2)^2 - \frac{\pi^2}{12} \right\} + O\left(\frac{1}{\Lambda^3}\right) \right], \quad (\text{S2})$$

1067 For the case of the slender sperm flagellum with  $h/L \ll 1$ ,  $\Lambda \cong 5$ , this expression  
1068 gives a maximal influx for the cylinder ( $J_{max}^{cyl}$ ) that is, again, approximately one tenth  
1069 that of the equivalent sphere:

$$1070 \quad J_{max}^{cyl} \cong \frac{2\pi}{5} LD\bar{c} \cong 0.1J_{max}^{sph}, \quad (\text{S3})$$

1071 The above description is valid only in the limit of instantaneous adsorption at the  
1072 receptors. For a finite rate of binding by the receptors we can simply modify the above  
1073 expressions to include an effective size for the binding sites  $s_e = k_{on}/D$  (Phillips et al.,  
1074 2012). With  $k_{on} = 24 \mu\text{M}^{-1}\text{s}^{-1}$  and  $27 \mu\text{M}^{-1}\text{s}^{-1}$  being the corresponding affinity constants  
1075 for speract and its receptor, calculated by Nishigaki in 2000 for *L. pictus* and in 2001  
1076 for *S. purpuratus* (Nishigaki et al., 2001; Nishigaki and Darszon, 2000), respectively.  
1077  $D = 240 \mu\text{m}^2\text{s}^{-1}$ ,  $s_e = 1.7 \text{ \AA}$  and  $1.9 \text{ \AA}$ , respectively, which is indeed much smaller than  
1078 the physical size of the receptors (**Table SI**). Note that the dimensions of the speract  
1079 receptor radius are not known, however Pichlo et al. (2014) provided an estimation of  
1080 the radius of the resact receptor (the extracellular domain of the GC) of 2.65 nm. The  
1081 value of  $s \sim 0.19 \text{ nm}$  used in this work is about one order of magnitude smaller than  
1082 such estimation. This value arises not from estimates of either receptor or  
1083 chemoattractant sizes, but rather from an estimate of the effective size of the binding  
1084 site, based on experimental measurements of chemoattractant binding kinetics.

1085

1086 These equivalences were used to obtain the estimates in **Table SI**, which are  
1087 discussed in the main text. From these estimates, we can compute  $N_{1/2} \sim 3 \times 10^4$  as the

1088 total number of SAP receptors for the *S. purpuratus* sperm flagellum to act as a perfect  
1089 absorber. As the actual number of SAP receptors for this species is lower than that  
1090 figure, *i.e.*  $N < N_{1/2}$ , we cannot approximate the solution of equation (S1) to that of a  
1091 perfect absorber. More specifically, under these circumstances the absorption remains  
1092 almost linearly dependent on the actual number of receptors on the flagellum (**Figure**  
1093 **S1**).

1094

### 1095 *1.2. A condition for detecting a change in the chemoattractant concentration*

1096 A cell uses the chemoattractant it samples from the medium as a proxy of the  
1097 extracellular concentration of the chemoattractant at any given time. The flux of  
1098 chemoattractant  $J$ , calculated in the previous section, measures the sampling rate.  
1099 Because the number of chemoattractant molecules is finite and small, the actual number  
1100 of molecules sampled by the cell in an interval of time  $\Delta t$  is a random variable, denoted  
1101  $n$ , which is Poisson distributed with expected value  $E[n] = J\Delta t$  and standard  
1102 deviation  $SD[n] = \sqrt{J\Delta t}$ . The chemotaxis signaling system of the spermatozoon  
1103 should remain unresponsive while the cell is swimming in an isotropic chemoattractant  
1104 concentration field, as there are no spatial cues for guidance (**Figure 1a**), although  
1105 motility responses may still be triggered. For example, the stereotypical turn-and-run  
1106 motility responses of *S. purpuratus* sperm in the presence of speract (isotropic fields or  
1107 weak gradients) (Wood et al., 2007)., it has been previously reported that the turn-and-  
1108 run motility response is necessary, but not sufficient, for sea urchin sperm chemotaxis  
1109 (Guerrero et al., 2010). The Poisson fluctuations of sampled chemoattractant  
1110 molecules, measured by  $\sqrt{J\Delta t}$  can be understood as background noise and hence  
1111 should not elicit a response. When the sperm is swimming confined to a plane in a  
1112 chemoattractant gradient produced by the egg (**Figures 1b** and **1c**), the chemotactic

1113 responses should be triggered only when the amplitude of the sampling fluctuations are  
 1114 sufficiently large as to not be confused with the background noise, i.e. when the  
 1115 difference in concentration at the two extremes of the circular trajectory leads to  
 1116 fluctuations in chemoattractant sampling that are larger than the background noise.  
 1117 These considerations lead to a minimal condition for reliable detection of a chemotactic  
 1118 signal (Berg and Purcell, 1977; Vergassola et al., 2007), the corresponding condition  
 1119 can be stated as:

$$1120 \quad \left(4\pi Da\bar{c} \frac{N}{N + \pi a/s} \Delta t\right) v \Delta t \frac{\partial c}{\partial r} \bar{c}^{-1} > \sqrt{4\pi Da\bar{c} \frac{N}{N + \pi a/s} \Delta t}, \quad (\text{S4})$$

1121 where  $E[n] = J\Delta t = 4\pi Da\bar{c} \frac{N}{N + \pi a/s} \Delta t$ ;  $\Delta t$  is specifically the time the sperm  
 1122 takes to make half a revolution in its circular trajectory;  $v$  is the mean linear velocity,  
 1123 defined as  $v = \frac{\Delta r}{\Delta t}$ , where  $\Delta r$  is the diameter of the circumference in the 2D sperm  
 1124 swimming circle (**Figure 1c** and **Table SI**); and  $\xi = \bar{c}^{-1} \frac{\partial c}{\partial r}$  is the relative slope of the  
 1125 chemoattractant concentration gradient.

1126 As described in the main text, by interpreting the left-hand side of the equation  
 1127 (**S4**) as the minimal chemotactic signal; and the right-hand side as a measurement of  
 1128 the background noise at a given mean concentration. Hence, one can obtain a minimal  
 1129 condition for the smallest signal to noise ratio (*SNR*) necessary to elicit a chemotactic  
 1130 response. Equation (**S4**) can be rewritten in terms of signal-to-noise ratio:

$$1131 \quad SNR = v \Delta t^{3/2} \left(4\pi Da\bar{c} \frac{N}{N + \pi a/s}\right)^{1/2} \xi > 1, \quad (\text{S5})$$

1132

1133 Note that all previous equations (**S1-S5**) are only valid for small Peclet numbers ( $Pe$   
 1134  $\leq 1$ ) which is indeed the case for chemoattractant transport to the sperm.  $Pe$  estimates  
 1135 the relative importance of advection (directed motion) and diffusion (random-like

1136 spreading) of "anything that moves". We are studying the motion of chemoattractant  
1137 molecules: they are transported (relative to the swimming sperm) by its swimming  
1138 while jiggling around by Brownian motion at the molecular scale.

1139 An evidence-based estimate of the Peclet number for chemoattractants can be pro-  
1140 vided by following the definition of the Peclet number  $Pe = UR/D$ , with the sperm  
1141 swimming speed in the range  $U \sim [72-100 \mu\text{m s}^{-1}]$ , diffusivity  $D \sim 240 \mu\text{m}^2 \text{s}^{-1}$  for the  
1142 chemoattractant. The critical length scale  $R$  for the diffusive problem can be estimated  
1143 by either i) computing the influx transport problem in a cylindrical geometry with the  
1144 fluid flow parallel to the flagellar long axis (i.e. the sperm swimming direction) for  
1145 which  $R$  is the flagellar width  $\sim 0.2 \mu\text{m}$ ; or ii) for the simplified spherical cell approxi-  
1146 mation for which  $R$  is simply the equivalent spherical radius  $a_e \sim [1.39-1.58 \mu\text{m}]$  (see  
1147 section *1.1. On the estimate of maximal chemoattractant absorption*). This renders  $Pe$   
1148  $\sim [6e-2 - 6e-1] \leq 1$  for all experiments presented in this manuscript.

1149

## 1150 **2. Extended Materials and Methods**

### 1151 *2.1. Materials*

1152 Undiluted *S. purpuratus* or *L. pictus* spermatozoa (JAVIER GARCIA PAMANES,  
1153 Ensenada, Mexico PPF/DGOPA224/18 Foil 2019, RNPYA 7400009200; and South  
1154 Coast Bio-Marine San Pedro, CA 90731, USA respectively) were obtained by  
1155 intracoelomic injection of 0.5 M KCl and stored on ice until used within a day. Artificial  
1156 seawater (ASW) was 950 to 1050 mOsm and contained (in mM): 486 NaCl, 10 KCl,  
1157 10 CaCl<sub>2</sub>, 26 MgCl<sub>2</sub>, 30 MgSO<sub>4</sub>, 2.5 NaHCO<sub>3</sub>, 10 HEPES and 1 EDTA (pH 7.8). For  
1158 experiments with *L. pictus* spermatozoa, slightly acidified ASW (pH 7.4) was used to  
1159 reduce the number of spermatozoa experiencing spontaneous acrosome reaction. Low  
1160 Ca<sup>2+</sup> ASW was ASW at pH 7.0 and with 1 mM CaCl<sub>2</sub>, and Ca<sup>2+</sup>-free ASW was ASW



1161 with no added CaCl<sub>2</sub>. [Ser5; nitrobenzyl-Gly6]speract, referred to throughout the text  
1162 as caged speract (CS), was prepared as previously described (Tatsu et al., 2002). Fluo-  
1163 4-AM and pluronic F-127 were from Molecular Probes, Inc. (Eugene, OR, USA).  
1164 PolyHEME [poly(2-hydroxyethylmethacrylate)] was from Sigma-Aldrich (Toluca,  
1165 Edo de Mexico, Mexico).

1166

### 1167 *2.2. Loading of Ca<sup>2+</sup>-fluorescent indicator into spermatozoa*

1168 This was done as in Beltrán et al., 2014, as follows: undiluted spermatozoa were  
1169 suspended in 10 volumes of low Ca<sup>2+</sup> ASW containing 0.2% pluronic F-127 plus 20  
1170 μM of fluo-4-AM and incubated for 2.5 h at 14 °C. Spermatozoa were stored in the dark  
1171 and on ice until use.

1172

### 1173 *2.3. Imaging of fluorescent swimming spermatozoa*

1174 The cover slips were briefly immersed into a 0.1% wt/vol solution of poly-HEME in  
1175 ethanol, hot-air blow-dried to rapidly evaporate the solvent, wash with distilled water  
1176 twice followed by ASW and mounted on reusable chambers fitting a TC-202 Bipolar  
1177 temperature controller (Medical Systems Corp.). The temperature plate was mounted  
1178 on a microscope stage (Eclipse TE-300; Nikon) and maintained at a constant 15 °C.  
1179 Aliquots of labeled sperm were diluted in ASW and transferred to an imaging chamber  
1180 (final concentration ~ 2x10<sup>5</sup> cells ml<sup>-1</sup>). Epifluorescence images were collected with a  
1181 Nikon Plan Fluor 40x 1.3 NA oil-immersion objective using the Chroma filter set (ex  
1182 HQ470/40x; DC 505DCXRU; em HQ510LP) and recorded on a DV887 iXon EMCCD  
1183 Andor camera (Andor Bioimaging, NC). Stroboscopic fluorescence illumination was  
1184 supplied by a Cyan LED no. LXHL-LE5C (Lumileds Lighting LLC, San Jose, USA)  
1185 synchronized to the exposure output signal of the iXon camera (2 ms illumination per

1186 individual exposure). Images were collected with Andor iQ 1.8 software (Andor  
1187 Bioimaging, NC) at 30.80 fps in full-chip mode (observation field of  $\sim 200 \times 200 \mu\text{m}$ ).

1188

#### 1189 *2.4. Image processing*

1190 The background fluorescence was removed by generating an average pixel intensity  
1191 time-projection image from the first 94 frames (3 seconds) before uncaging, which was  
1192 then subtracted from each frame of the image stack by using the Image calculator tool  
1193 of ImageJ 1.49u (Schneider et al., 2017). For **Figure 2d**, the maximum pixel intensity  
1194 time projections were created every 3 s from background-subtracted images before and  
1195 after the UV flash.

1196

#### 1197 *2.5. Quantitation of global changes of spermatozoa number and $[\text{Ca}^{2+}]_i$*

1198 To study the dynamics of overall sperm motility and  $[\text{Ca}^{2+}]_i$  signals triggered by the  
1199 distinct speract gradients we developed a segmentation algorithm that efficiently and  
1200 automatically detects the head of every spermatozoa in every frame of a given video-  
1201 microscopy archive (C/C++, OpenCV 2.4, Qt-creator 2.4.2). Fluorescence microscopy  
1202 images generated as described previously were used. The following steps summarize  
1203 the work-flow of the algorithm (**Figure S2**):

1204 1. Segment regions of interest from background: This step consists of thresholding  
1205 each image (frame) of the video to segment the zones of interest (remove noise  
1206 and atypical values). Our strategy includes performing an automatic selection of  
1207 a threshold value for each Gaussian blurred image ( $I_G$ ) ( $\sigma = 3.5 \mu\text{m}$ ) considering  
1208 the mean value ( $M_I$ ) and the standard deviation ( $SD_I$ ) of the image  $I_G$ . The  
1209 threshold value is defined by:  $T_I = M_I + 6SD_I$ .

1210 2. Compute the connected components: The connected components labeling is

1211 used to detect connected regions in the image (a digital continuous path exists  
1212 between all pairs of points in the same component - the sperm heads). This  
1213 heuristic consists of visiting each pixel of the image and creating exterior  
1214 boundaries using pixel neighbors, accordingly to a specific type of connectivity.  
1215 3. Measure sperm head fluorescence. For each region of interest, identify the  
1216 centroid in the fluorescence channel (sperm head) and measure the mean value.  
1217 4. Compute the relative positions of the sperm heads within the imaging field, and  
1218 assign them to either R1, R2, R3 or R4 concentric regions around the centroid of  
1219 the UV flash intensity distribution. The radii of R1, R2, R3 or R4, were 25, 50,  
1220 75 and 100  $\mu\text{m}$ , respectively.  
1221 5. Repeat steps 1 to 4 in a frame-wise basis.

1222 Step 1 of the algorithm filters out shot noise and atypical values; step 2 divides the  
1223 images into N connected components for the position of the sperm heads; step 3  
1224 quantitates sperm head fluorescence, and finally step 4 computes the relative sperm  
1225 position on the imaging field. A similar approach has been recently used to identify  
1226 replication centers of adenoviruses in fluorescence microscopy images (Garcés et al.,  
1227 2016).

1228 We automatically analyzed 267 videos of *S. purpuratus* spermatozoa, each  
1229 containing tens of swimming cells, exposed to five distinct speract concentration  
1230 gradients.

1231

## 1232 2.6. Analysis of speract induced $\text{Ca}^{2+}$ transients with immobilized spermatozoa

1233 Imaging chambers were prepared by coating cover slips with 50  $\mu\text{g}/\text{ml}$  poly-D-lysine,  
1234 shaking off excess, and allowing to air-dry. Coated cover slips were then assembled  
1235 into imaging chambers. Fluo-4 labeled spermatozoa were diluted 1:40 in ASW,

1236 immediately placed into the chambers, and left for 2 min, after which unattached sperm  
1237 were removed by washing with ASW. The chambers were then filled with 0.5 ml of  
1238 ASW containing 500 nM of caged speract and mounted in a TC-202 Bipolar  
1239 temperature controller (Medical Systems Corp.). Images were collected with Andor iQ  
1240 1.7 software (Andor Bioimaging, NC) at 90 fps in full-chip mode, binning 4x4  
1241 (observation field of 200  $\mu\text{m}$  x 200  $\mu\text{m}$ ). The imaging setup was the same as that used  
1242 for swimming spermatozoa. The caged speract was photo-released with a 200 ms UV  
1243 pulse delivered through an optical fiber (4 mm internal diameter) coupled to a Xenon  
1244 UV lamp (UVICO, Rapp Opto Electronic). The optical fiber was mounted on a  
1245 “defocused” configuration to minimize the generation of UV light heterogeneities.

1246 Images were processed off-line using ImageJ 1.45s. Overlapping spermatozoa and  
1247 any incompletely adhered cells, which moved during the experiment, were ignored.  
1248 Fluorescence measurements in individual sperm were made by manually drawing a  
1249 region of interest around the flagella with the polygon selections tool of ImageJ.

1250

### 1251 *2.7. Sperm swimming behavior in different chemoattractant gradients*

1252 The sperm swimming behavior in response to a chemoattractant concentration gradient  
1253 can be classified accordingly to their orientation angle ( $\Theta$ ), which is formed between  
1254 their reference and velocity vectors (**Figure 4b**). For the sake of simplicity, chemotactic  
1255 drifts (towards the source of the chemoattractant gradient) were considered to fall  
1256 within the category of ( $\Theta < 60^\circ$ ). The drift of swimming sperm in a direction perpen-  
1257 dicular to the gradient results from orientation angles falling within the range  $60^\circ \leq \Theta$   
1258  $\leq 120^\circ$ . The instances of negative chemotactic drifts (opposite to the source of the  
1259 chemoattractant gradient) were classified as those having higher orientation angles  $\Theta >$   
1260  $120^\circ$  (**Figure S8**).

1261 The proportion of spermatozoa orientated with low  $\Theta$  angles, i.e. towards the source  
1262 of the chemoattractant concentration gradient is enriched in those gradients that give  
1263 chemotactic responses:  $f2$  ( $p\text{-value} < 0.001$ ) and  $f5$  ( $p\text{-value} = 0.003$ ); compare with  $f1$   
1264 ( $p\text{-value} = 0.2$ ) and  $f4$  ( $p\text{-value} = 0.51$ ). Statistical comparisons were performed with  
1265 the Pearson's Chi-squared test considering a probability of success of 1/3 for each type  
1266 of response (non-responding cells were not considered).

1267 The two tested negative controls for chemotaxis (Low  $\text{Ca}^{2+}$  or High extracellular  $\text{K}^+$   
1268 ( $[\text{K}^+]_e$ ) for  $f2$  gradient) showed a complete distinct distribution that the corresponding  
1269  $f2$  gradient ( $f2.0Ca$   $p\text{-value} < 0.001$ ,  $f2.K$   $p\text{-value} = 0.01$ , Fisher's exact test), i.e. as ex-  
1270 pected the proportion of cells experiencing chemotactic drift was significantly reduced  
1271 on the negative controls.

1272 Interestingly, the  $f3$  gradient provides the major stimulation of cell motility (the fre-  
1273 quency of non-responsive cells drops down to ~2%), however in this experimental con-  
1274 dition the proportion of cells responding towards the source of the chemoattractant gra-  
1275 dient was not significantly distinct from the other two types of responses ( $p\text{-value} =$   
1276  $0.12$ , Pearson's Chi-squared test).

1277 In any tested gradient, the distributions of orientation angles have the same propor-  
1278 tions between perpendicular and opposite to the source responses:  $f1$  ( $p\text{-value} = 0.63$ ),  
1279  $f2$  ( $p\text{-value} = 1$ ),  $f3$  ( $p\text{-value} = 0.4$ ),  $f4$  ( $p\text{-value} = 0.84$ ) and  $f5$  ( $p\text{-value} = 0.15$ ). Statistical  
1280 comparisons were performed with the exact binomial test considering a hypothesized  
1281 probability of success of 0.5.

1282

1283 2.8. Spontaneous vs speract-induced  $[\text{Ca}^{2+}]_i$  oscillations

1284 We characterized and compared the spontaneous vs the speract-induced  $\text{Ca}^{2+}$  oscilla-  
1285 tions (**Figure S9**) and conclude that they are completely different phenomena. Sponta-  
1286 neous  $\text{Ca}^{2+}$  oscillations are only observed in about 10% of the analyzed population of  
1287 spermatozoa (see **Statistical analysis** section in **Materials and Methods** on the man-  
1288 uscript). Most of the time only one spontaneous oscillation is observed, and in the cases  
1289 where more than one spontaneous oscillation is present (which accounts for ~20% of  
1290 the spontaneous oscillations, i.e. only 2% of the total cells analyzed), they are signifi-  
1291 cantly different in nature to the speract-induced  $\text{Ca}^{2+}$  oscillations, judged as follows:  
1292 they display a larger period and amplitude (~ one order of magnitude) when compared  
1293 to the speract induced oscillations (**Figure S9c** and **S9d**). When these  $\text{Ca}^{2+}$  spontaneous  
1294 oscillations occur, if not very large, the cell will change direction randomly. If the os-  
1295 cillation is large enough, and is beyond a certain  $[\text{Ca}^{2+}]_i$  threshold, the cell stops swim-  
1296 ming altogether (see for example: Wood et al., 2005; Guerrero et al., 2013). After de-  
1297 tection, we discarded cells undergoing spontaneous oscillations in the present work.  
1298

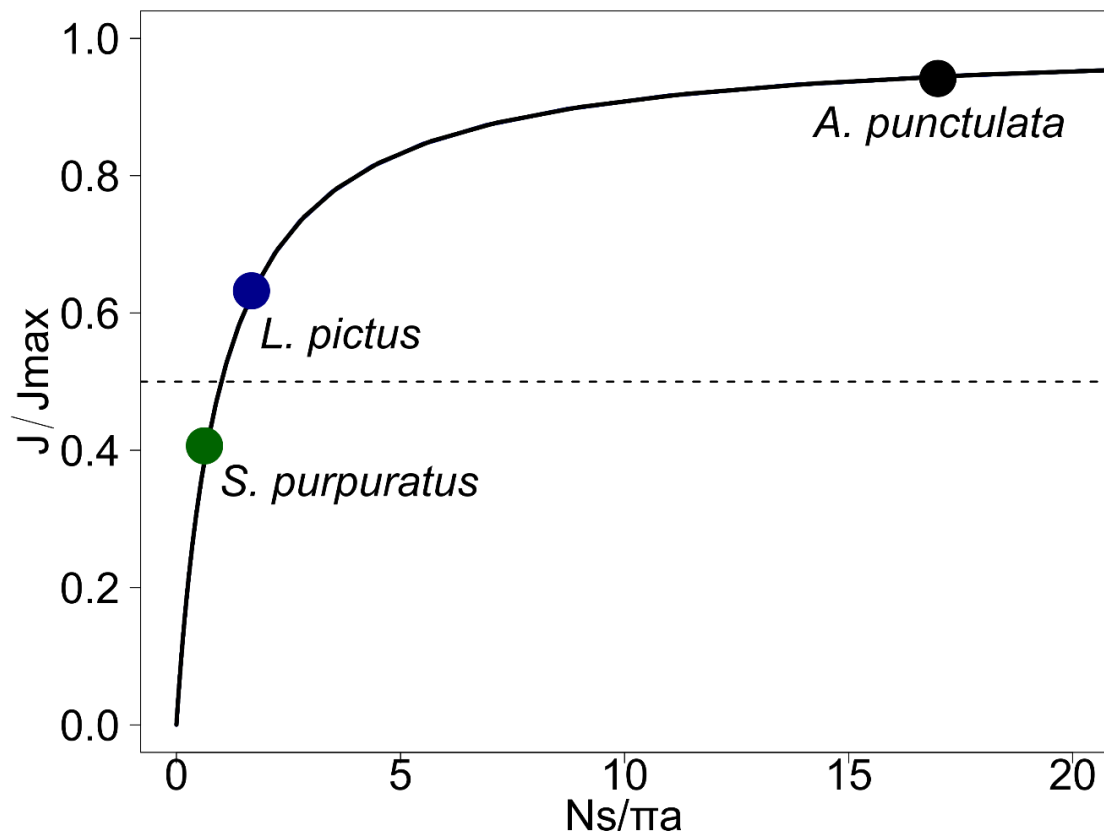

1299

1300 **Figure S1. Chemoattractant diffusive currents have a non-linear relationship to**  
1301 **receptor coverage.** For a spherical cell of radius  $a$ , with  $N$  disk-like receptors of  
1302 effective radius  $s$ , the diffusive current saturates for  $N \gg N_{1/2} = \pi a/s$  ( $N_{1/2}$  is highlighted  
1303 for *S. purpuratus*, *L. pictus* and *A. punctulata* with a green, blue and black dots,  
1304 respectively). For *S. purpuratus*, however, the number of receptors is smaller than  $N_{1/2}$   
1305 and the diffusive influx falls into an almost linear regime.

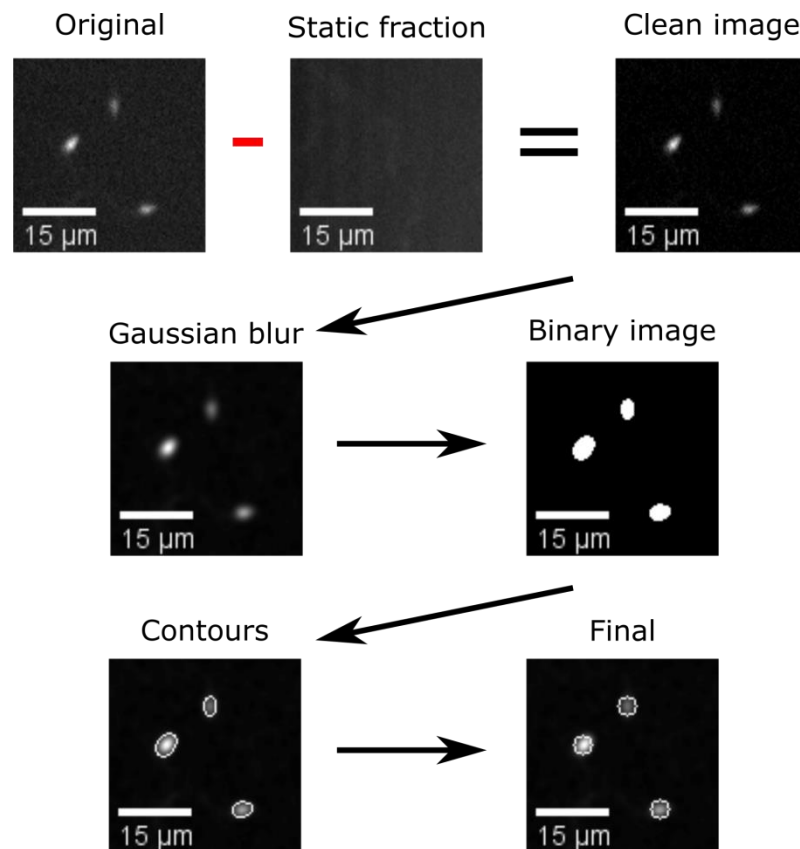

1306

1307 **Figure S2. Automatic segmentation of swimming spermatozoa.** Work-flow of the  
1308 segmentation algorithm: Video microscopy images were background subtracted by  
1309 removing the temporal average intensity projection (static fraction) of the un-stimulated  
1310 frames (93 frames = 3 seconds), from the whole video (25 seconds). The resulting  
1311 images were convolved with a low-pass spatial frequency filter to reduce noise  
1312 (detector, electronic, shot). The resulting images were thresholded to generate arrays of  
1313 regions of interest (ROIs), a heuristic search for connected components was then  
1314 applied to label single ROIs and to assign the corresponding pixels to unique  
1315 spermatozoa. Scale bar of 15  $\mu\text{m}$ .



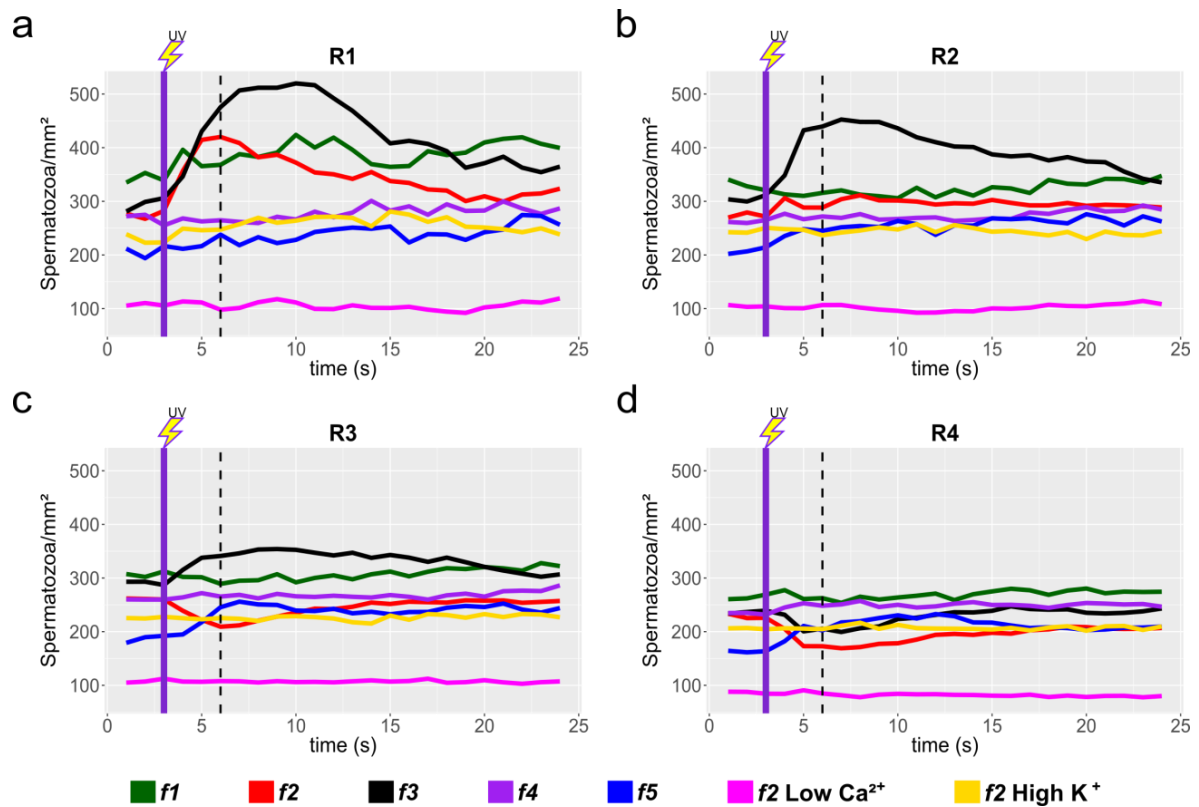

1316

1317 **Figure S3. Sperm response to speract photo-release, collated data from individual**

1318 **experiments.** Sperm motility responses to different speract concentration gradients ( $f1$ ,

1319  $f2$ ,  $f3$ ,  $f4$ ,  $f5$ ) at R1 (a), R2 (b), R3 (c) and R4 (d) concentric regions (see **Figure 3a**).

1320 Negative controls for sperm chemotaxis are artificial sea water with nominal 0 Ca<sup>2+</sup>

1321 (Low Ca<sup>2+</sup>); and artificial sea water with 40 mM of K<sup>+</sup> (High K<sup>+</sup>). Each time trace

1322 represents the mean sperm density from up to 20 video microscopy experiments. Note

1323 that peak responses occurred around 6 seconds (shown by the vertical dashed lines),

1324 some 3 seconds after speract exposure (indicated as vertical dotted lines). Purple

1325 vertical line indicates the UV flash (200 ms).

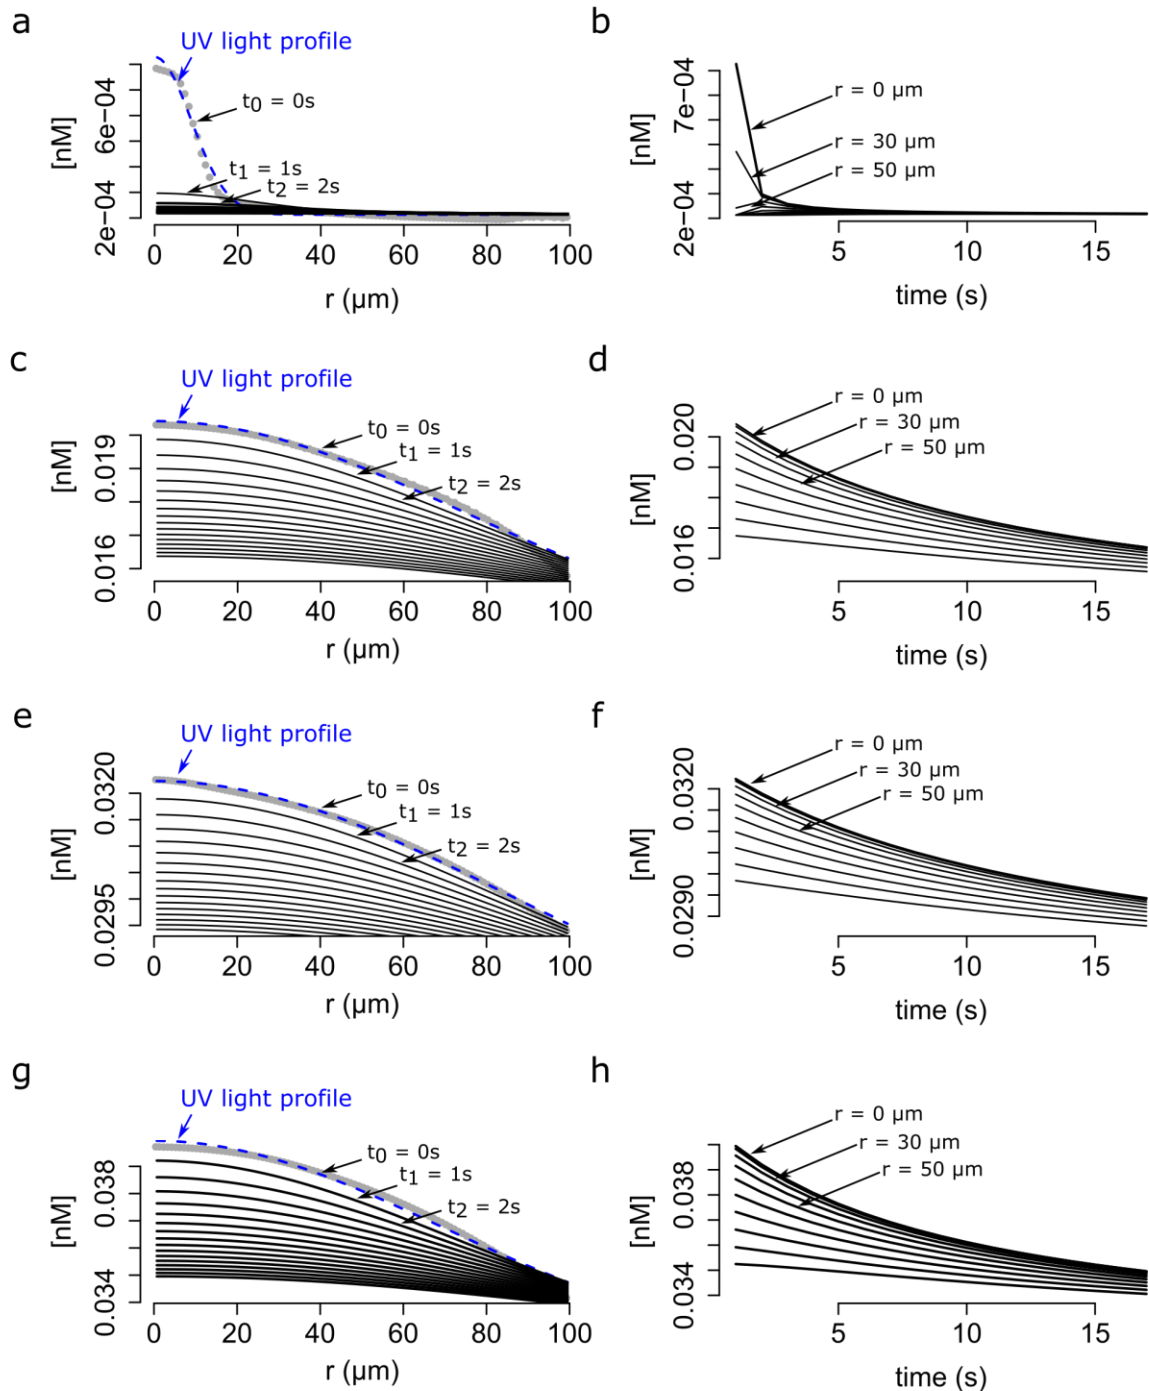

1326

1327 **Figure S4. Modeling of the dynamics of speract gradient based on the UV light**

1328 **profile of distinct optical fibers.** The radial profiles of the UV light scattered at the

1329 glass-liquid interface of  $f1$ ,  $f3$ ,  $f4$ ,  $f5$  optical fibers are shown in gray. The speract

1330 gradient was generated as in **figure 5**, but with the corresponding  $f1$  (**a** and **b**),  $f3$  (**c** and

1331 **d**),  $f4$  (**e** and **f**) and  $f5$  (**g** and **h**) optical fibers. *Left panels* - The dynamics of the speract

1332 gradient computed as is in **figure 5**. The blue dashed line ( $t_0 = 0$ ) corresponds to a

1333 Gaussian distribution fitted to the UV light profile, and illustrates the putative shape of  
1334 the instantaneously generated speract gradient. Solid black lines illustrate the shape of  
1335 the speract gradient after  $t = 1, 2, 3, \dots, 20$  seconds. *Right panels* - Simulated temporal  
1336 changes in speract concentration gradients of  $f1$  (**a**),  $f3$  (**c**),  $f4$  (**e**) and  $f5$  (**g**) at each 10  
1337  $\mu\text{m}$  radial point from the center of the concentration gradient.

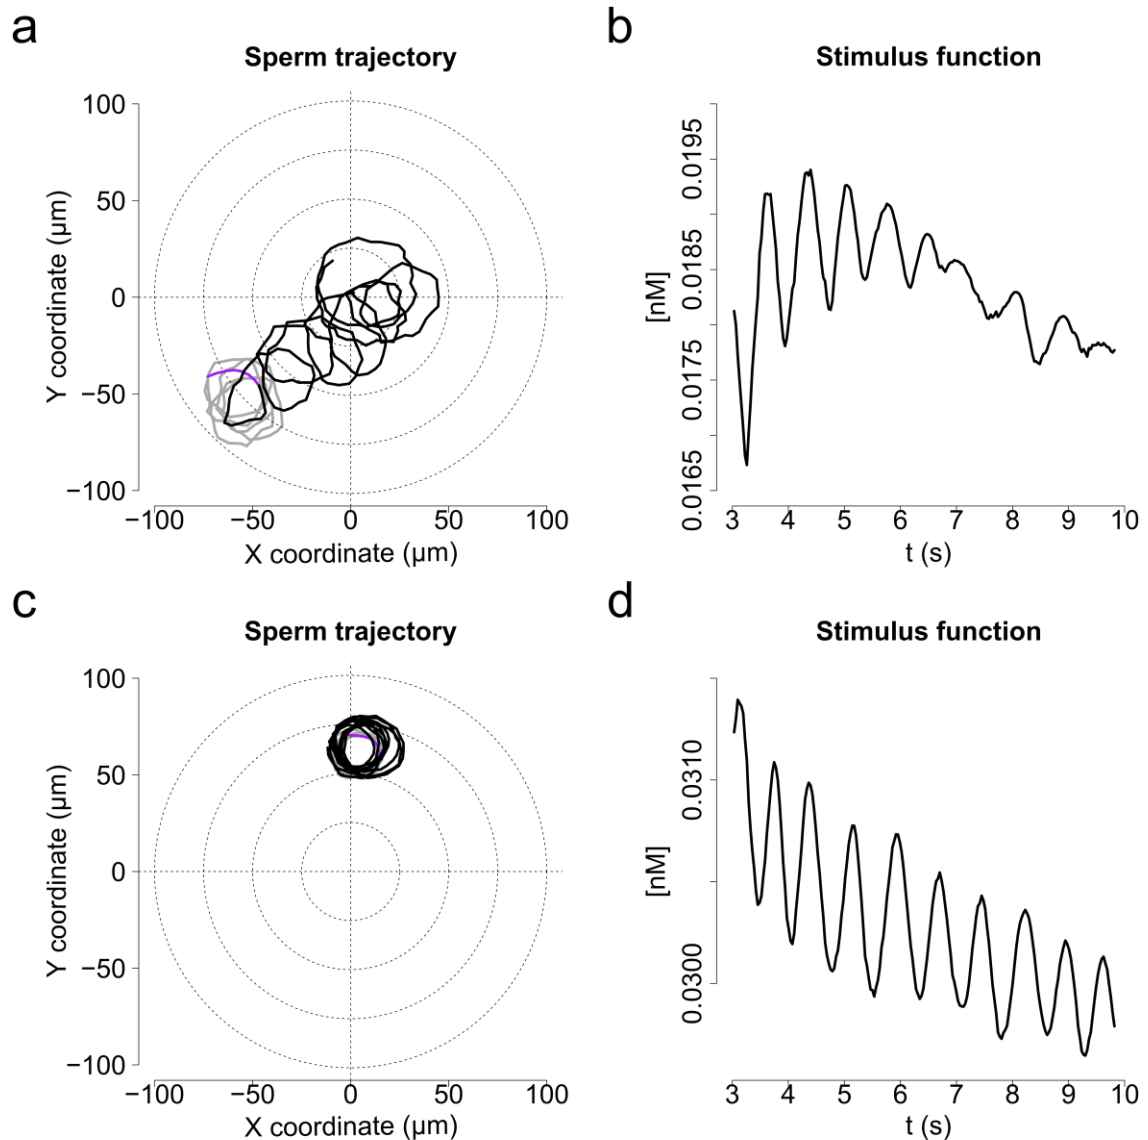

1338

1339 **Figure S5. Characteristic motility changes of a *S. purpuratus* spermatozoon ex-**  
1340 **posed to *f3* and *f4* speract gradients (chemotactic vs non-chemotactic response).**

1341 Panels **a** and **b** show single cell responses to the *f3* speract gradient (chemotactic); and

1342 panels **c** and **d** to the *f4* speract gradient (non-chemotactic). **a, c.** Solid lines illustrate

1343 the spermatozoon swimming trajectory 3 s before (gray) and 6 s after (black) speract

1344 gradient exposure. **b, d.** Stimulus function computed from **a** and **c**, considering the spa-

1345 tio-temporal dynamics of speract computed for the *f3* and *f4* gradients, respectively.

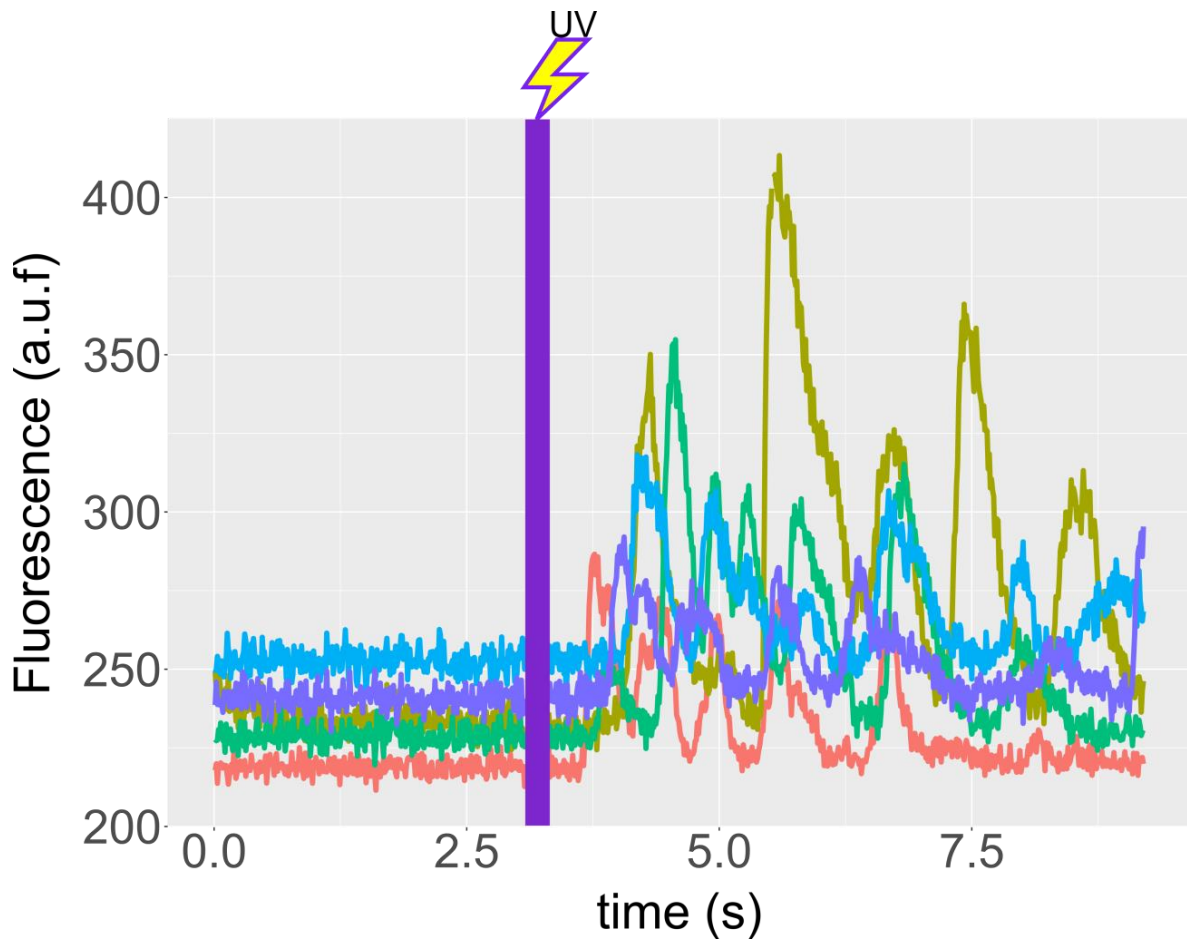

1346

1347 **Figure S6. Speract induces  $\text{Ca}^{2+}$  oscillations in immobilized *S. purpuratus***

1348 **spermatozoa.** Spermatozoa were immobilized on cover slips coated with poly-D-

1349 lysine (see **Materials and Methods**), and ASW containing 500 nM caged speract

1350 added. Recordings were performed 3s before and during 6s after 200 ms of UV

1351 irradiation. *f4* optical fiber was used for the UV light path, to generate the speract

1352 concentration gradient. Time traces indicate the  $[\text{Ca}^{2+}]_i$  of selected spermatozoa of

1353 **Movie S8.** Note that the photo-release of speract induces a train of  $[\text{Ca}^{2+}]_i$  increases in

1354 immobilized spermatozoa, and hence provides evidence for the presence of an internal

1355  $\text{Ca}^{2+}$  oscillator triggered by speract.

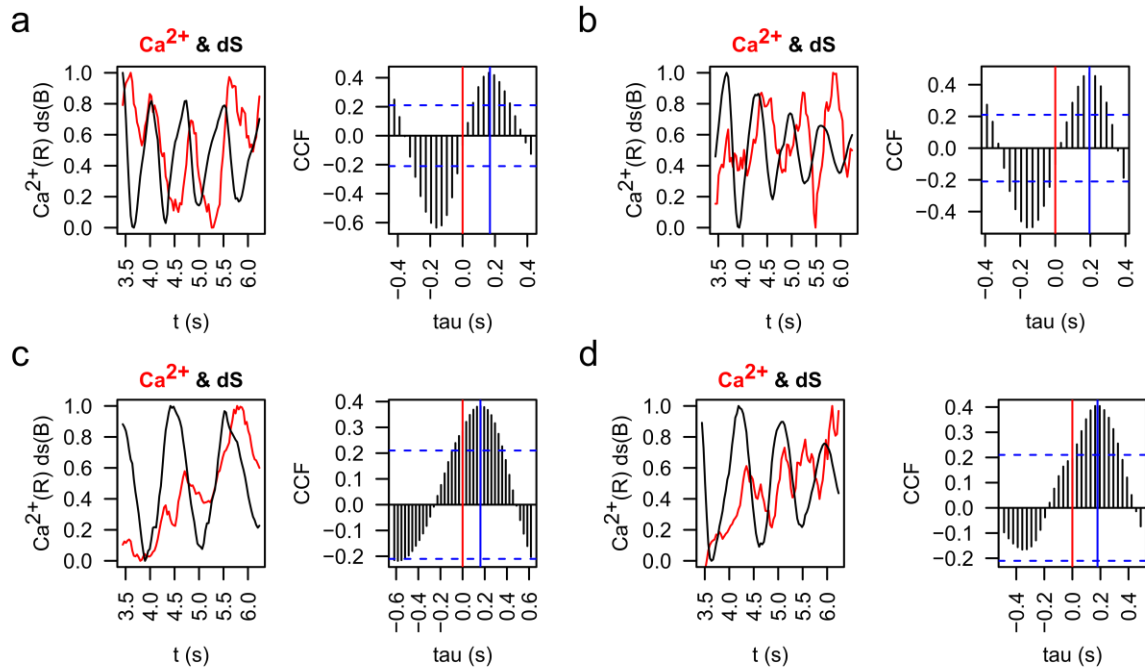

1356

1357 **Figure S7. Cross-correlation analysis of  $[Ca^{2+}]_i$  and stimulus function derivative**

1358 **(dS) signals.** Representative examples of  $[Ca^{2+}]_i$  (red) and the derivative of the stimulus

1359 function (dS) (black) were plotted and then analyzed by cross-correlation analysis

1360 (CCF). Red vertical lines indicate the zero, blue vertical lines indicate the point of

1361 maximum correlation for each case, which means that the phase shifting between

1362  $[Ca^{2+}]_i$  and dS is around 200 ms in these cases. Examples of a pair of spermatozoa for

1363 the two principal chemotactic gradients ( $f_2$  and  $f_3$ ) are shown. **a, b.** Representative

1364 examples of two spermatozoa in an  $f_2$  gradient. **c, d.** Representative examples of two

1365 spermatozoa in an  $f_3$  gradient.

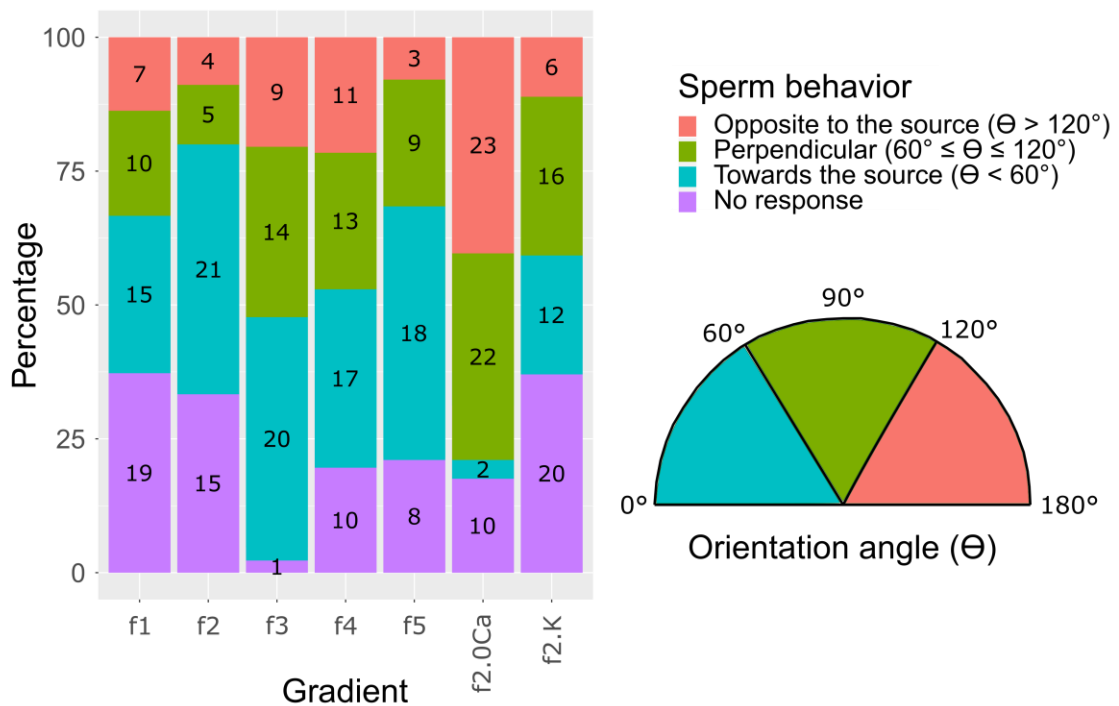

1366

1367 **Figure S8. Sperm swimming behavior in response to different chemoattractant**

1368 **gradients.** *S. purpuratus* sperm behavior classified in four different classes: i) No re-

1369 sponse (purple), when spermatozoa keep swimming in concentric circles and do not

1370 move more than 15  $\mu\text{m}$  of progressive swimming; ii) Towards the chemoattractant

1371 source (cyan), when spermatozoa respond drifting in swimming circles with an orien-

1372 tation angle ( $\Theta$ ) smaller than  $60^\circ$  ( $\Theta < 60^\circ$ ); iii) Opposite to the chemoattractant source

1373 (pink), when spermatozoa respond drifting in swimming circles with an orientation an-

1374 gle ( $\Theta$ ) bigger than  $120^\circ$  ( $\Theta > 120^\circ$ ); and iv) Perpendicular to the chemoattractant

1375 source (green), when spermatozoa respond drifting in swimming circles with an orien-

1376 tation angle ( $\Theta$ ) smaller than  $120^\circ$  but bigger than  $60^\circ$  ( $60^\circ \leq \Theta \leq 120^\circ$ ). The orientation

1377 angle  $\Theta$  is defined as the swimming angle of the drifting circles after speract uncaging

1378 (see **Figure 4b**). This analysis was made at second 6 after speract uncaging. Numbers

1379 in each bar represent the number of spermatozoa in each condition. Inset at the right

1380 panel shows the orientation angles ( $\Theta$ ). For further information see **Extended**

1381 **Materials and Methods**, section 2.7. *Sperm swimming behavior in different chemo-*  
1382 *attractant gradients.*



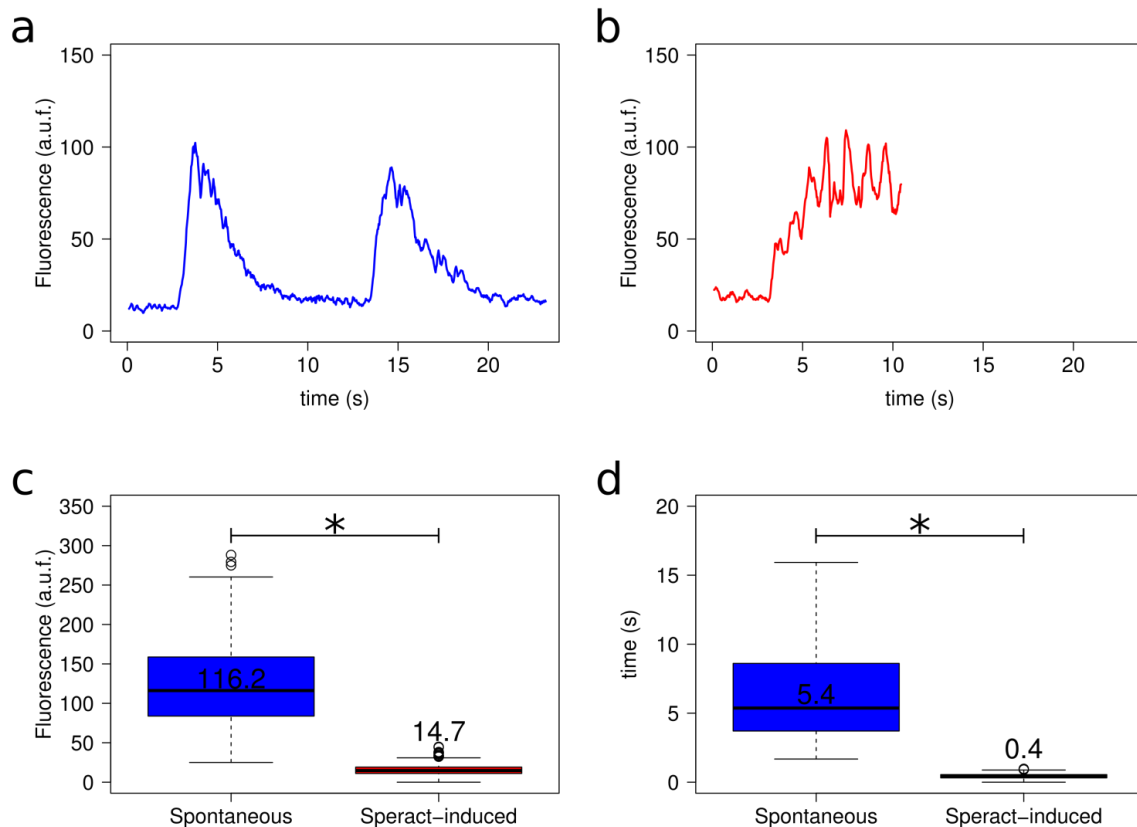

1383

1384

**Figure S9. Spontaneous vs speract-induced  $[Ca^{2+}]_i$  oscillations.** a. Example of a

1385 spontaneous  $Ca^{2+}$  oscillation (two oscillations). Only 20% of sperm experiencing spon-

1386 taneous oscillations suffer more than one oscillation, most of them experience only one

1387  $[Ca^{2+}]_i$  increase. b. Representative trace of speract-induced oscillations. Caged-speract

1388 was release after third second. c. Comparison of  $Ca^{2+}$  oscillation amplitude between

1389 spontaneous (blue) vs speract-induced (red) oscillations.  $n = 75$  for spontaneous and  $n$

1390  $= 56$  for speract-induced oscillations. d. Comparison of  $Ca^{2+}$  oscillation period between

1391 spontaneous (blue) vs speract-induced (red) oscillations.  $n = 16$  for spontaneous and  $n$

1392  $= 56$  for speract-induced oscillations. \*Statistical significance,  $p < 0.01$ , Mann-Whitney

1393  $U$  test.  $[Ca^{2+}]_i$  oscillation traces (panels a and b) were smoothed using an average filter

1394 with a 4 frame window in a 30.8 fps setting. For further information see **Extended**

1395 **Materials and Methods**, section 2.8. *Spontaneous vs speract-induced  $[Ca^{2+}]_i$  oscilla-*

1396 *tions.*

1397 **Table SI. Parameters of the chemoattractant sampling model for each species.**

|                                          | <i>S. purpuratus</i>                                                          | <i>L. pictus</i>                                                              | <i>A. punctulata</i>                                                          |
|------------------------------------------|-------------------------------------------------------------------------------|-------------------------------------------------------------------------------|-------------------------------------------------------------------------------|
| $N$ [per cell]                           | $2.0 \times 10^4$ <sup>b</sup>                                                | $6.3 \times 10^4$ <sup>b</sup>                                                | $3.0 \times 10^5$ <sup>f</sup>                                                |
| $N_{1/2}$                                | $2.9 \times 10^4$ <sup>c</sup>                                                | $3.6 \times 10^4$ <sup>c</sup>                                                | $1.8 \times 10^4$ <sup>c</sup>                                                |
| $D$ [cm <sup>2</sup> s <sup>-1</sup> ]   | $2.4 \times 10^{-6}$ <sup>c</sup>                                             | $2.4 \times 10^{-6}$ <sup>c</sup>                                             | $2.4 \times 10^{-6}$ <sup>e</sup>                                             |
| $Kon$ [M <sup>-1</sup> s <sup>-1</sup> ] | $2.7 \times 10^7$ <sup>b</sup>                                                | $2.4 \times 10^7$ <sup>b</sup>                                                | $5.0 \times 10^7$ <sup>f</sup>                                                |
| $s$ [cm]                                 | $1.87 \times 10^{-8}$ <sup>c</sup>                                            | $1.66 \times 10^{-8}$ <sup>c</sup>                                            | $3.46 \times 10^{-8}$ <sup>c</sup>                                            |
| $\Delta t$ [s]                           | $0.39 \pm 0.08$ <sup>a</sup>                                                  | $0.52 \pm 0.22$ <sup>a</sup>                                                  | 0.60                                                                          |
| $v$ [cm s <sup>-1</sup> ]                | $71.8 \times 10^{-4}$ <sup>c</sup>                                            | $88.5 \times 10^{-4}$ <sup>c</sup>                                            | $100 \times 10^{-4}$ <sup>c</sup>                                             |
| $\Delta r$ [cm]                          | $28 \pm 6 \times 10^{-4}$ <sup>a</sup>                                        | $46 \pm 14 \times 10^{-4}$ <sup>a</sup>                                       | $60 \times 10^{-4}$                                                           |
| $L$ [cm]                                 | $39.2 \pm 2.2 \times 10^{-4}$ <sup>d</sup>                                    | $48.7 \pm 2.1 \times 10^{-4}$ <sup>d</sup>                                    | $50 \times 10^{-4}$ <sup>e</sup>                                              |
| $a$ [cm]                                 | $1.39 \times 10^{-4}$ <sup>c</sup>                                            | $1.56 \times 10^{-4}$ <sup>c</sup>                                            | $1.58 \times 10^{-4}$ <sup>c</sup>                                            |
| $Pe$                                     | $4.2 \times 10^{-1}$ (sphere)<br>$6.0 \times 10^{-2}$ (cylinder) <sup>g</sup> | $5.8 \times 10^{-1}$ (sphere)<br>$7.4 \times 10^{-2}$ (cylinder) <sup>g</sup> | $6.6 \times 10^{-1}$ (sphere)<br>$8.3 \times 10^{-2}$ (cylinder) <sup>g</sup> |

1398

1399 Note that the main differences between species are the number of receptors  $N$ .  $N_{1/2}$   
1400 number of receptors that allows half maximal binding rate for any concentration of  
1401 chemoattractant, i.e.  $\pi a/s$ .  $D$  diffusion coefficient of the chemoattractant;  $Kon$  associa-  
1402 tion rate constant;  $s$  effective radius of the chemoattractant (as proxy of chemoattract-  
1403 ant receptor's binding site radius);  $\Delta t$  sampling time (time to swim half the circumfer-  
1404 ence in the boundary close to the water-glass interface);  $v$  mean linear speed of the  
1405 spermatozoa, i.e.  $\Delta r/\Delta t$ ;  $\Delta r$  sampling distance (circumference diameter);  $L$  length of  
1406 sperm flagellum;  $a$  spermatozoa radius, assuming that flagella are spheres;  $Pe$  Peclet  
1407 number for a spherical cell approximation (sphere), or cylindrical flagellum geometry  
1408 (cylinder). <sup>a</sup> Measured in this study (mean  $\pm$  sd);  $N = 3$  sea urchins;  $n = 495$  (*S. purpu-*  
1409 *ratus*),  $n = 56$  (*L. pictus*) spermatozoa. <sup>b</sup> Nishigaki et al., 2001; Nishigaki and Darszon,  
1410 2000. <sup>c</sup> Calculated in this study (see section **1.1. On the estimate of maximal chemo-**  
1411 **attractant absorption**). <sup>d</sup> Measured in this study (mean  $\pm$  sd);  $N = 1$  sea urchin;  $n = 26$

- 1412 (*S. purpuratus*), n = 39 (*L. pictus*) spermatozoa. <sup>e</sup> Kashikar et al., 2012. <sup>f</sup> Pichlo et al.,  
1413 2014 reported  $6.5 \times 10^{-8}$  cm for the resact radius. <sup>g</sup> Calculated in this study.

1414 **Table SII. Physical diameter of the optical fibers, and UV light power measured**  
1415 **at the back focal plane of the objective.**

1416

|           | Physical diameter (mm) | UV power at the back focal plane of the objective (mW)* |
|-----------|------------------------|---------------------------------------------------------|
| <i>f1</i> | 0.2                    | 0.07                                                    |
| <i>f2</i> | 0.6                    | 1.25                                                    |
| <i>f3</i> | 2                      | 4.7                                                     |
| <i>f4</i> | 4                      | 7.8                                                     |
| <i>f5</i> | 4                      | 9.46                                                    |

1417

1418

1419

1420

1421

1422

1423

1424

1425

1426

1427 \*Typically, there is an extra 20% loss of light power between the back focal plane of

1428

the objective and the sample, due to scattering within the optics.

1429 **Supplementary Movies**

1430 <https://www.dropbox.com/s/v1h4kx6oqxc0f5l/Movie%202.avi?dl=0>

1431 **Movie S1. Typical motility and  $\text{Ca}^{2+}$  responses of *S. purpuratus* spermatozoa**  
1432 **towards an  $f\beta$ -generated speract concentration gradient.** An optical fiber of 2 mm  
1433 internal diameter ( $f\beta$ ) was used for the UV light path to generate the speract  
1434 concentration gradient. Other imaging conditions were set up as for **Movie 1**. Note that  
1435 spermatozoa located at R2, R3 and R4 regions prior to speract exposure swim up the  
1436 concentration field towards the center of the gradient (R1). The pseudo-color scale  
1437 represents the relative fluorescence of fluo-4, a  $\text{Ca}^{2+}$  indicator, showing maximum (red)  
1438 and minimum (blue) relative  $[\text{Ca}^{2+}]_i$ . Six *S. purpuratus* spermatozoa were manually  
1439 tracked for visualization purposes. Scale bar of 50  $\mu\text{m}$ .

1440 <https://www.dropbox.com/s/27v2i3ofda57fqs/Movie%203.avi?dl=0>

1441 **Movie S2. Chemotaxis of *S. purpuratus* spermatozoa requires extracellular**  
1442 **calcium.** Spermatozoa swimming in artificial sea water with nominal calcium  
1443 containing 10 nM caged speract 3 s before and 5 s after exposure to 200 ms UV light.  
1444 Nominal calcium disrupts the electrochemical gradient required for Ca<sup>2+</sup> influx, hence  
1445 blocking the triggering of the internal Ca<sup>2+</sup> oscillation by speract. The f2 fiber (0.6 mm  
1446 diameter) was used to uncage speract in this control. Other imaging conditions were set  
1447 up as for **Movie 1**. Note that spermatozoa re-located after speract uncaging but they  
1448 failed to experience the Ca<sup>2+</sup>-driven motility alteration triggered by speract. As a  
1449 consequence, they failed to experience chemotaxis (compare with **Movie 1**). The  
1450 pseudo-color scale represents the relative fluorescence of fluo-4, a Ca<sup>2+</sup> indicator,  
1451 showing maximum (red) and minimum (blue) relative [Ca<sup>2+</sup>]<sub>i</sub>. Six *S. purpuratus*  
1452 spermatozoa were manually tracked for visualization purposes. Scale bar of 50 μm.

1453 <https://www.dropbox.com/s/vft4aiw96fpf3sy/Movie%204.avi?dl=0>

1454 **Movie S3. Disrupting the K<sup>+</sup> electrochemical gradient blocks chemotaxis of *S.***

1455 ***purpuratus* spermatozoa.** Cells were swimming in artificial sea water containing 40

1456 mM of KCl, and 10 nM caged speract 3 s before and 5 s after exposure to 200 ms UV

1457 light. High K<sup>+</sup> in the ASW blocks the membrane potential hyperpolarization required

1458 for opening Ca<sup>2+</sup> channels, and hence prevents the triggering of the internal Ca<sup>2+</sup>

1459 oscillator by speract exposure. The *f2* fiber (0.6 mm diameter) was used to uncage

1460 speract in this control. Other imaging conditions were set up as for **Movie 1**. Note that

1461 spermatozoa re-located after speract uncaging but they failed to experience the Ca<sup>2+</sup>-

1462 driven motility alteration triggered by speract, and thus they failed to experience

1463 chemotaxis (compare with **Movie 1**). The pseudo-color scale represents the relative

1464 fluorescence of fluo-4, a Ca<sup>2+</sup> indicator, showing maximum (red) and minimum (blue)

1465 relative [Ca<sup>2+</sup>]<sub>i</sub>. Six *S. purpuratus* spermatozoa were manually tracked for visualization

1466 purposes. Scale bar of 50 μm.

1467 <https://www.dropbox.com/s/l3l7nmh1yw9juov/Movie%205.avi?dl=0>

1468 **Movie S4. Typical motility and  $\text{Ca}^{2+}$  responses of *S. purpuratus* spermatozoa**

1469 **towards an *fI*-generated speract concentration gradient.** An optical fiber of 0.2 mm

1470 internal diameter (*fI*) was used for the UV light path to generate the speract

1471 concentration gradient. Other imaging conditions were set up as for **Movie 1**. Note that

1472 some spermatozoa re-located after speract uncaging but they failed to experience

1473 chemotaxis (compare with **Movie 1**). The pseudo-color scale represents the relative

1474 fluorescence of fluo-4, a  $\text{Ca}^{2+}$  indicator, showing maximum (red) and minimum (blue)

1475 relative  $[\text{Ca}^{2+}]_i$ . Six *S. purpuratus* spermatozoa were manually tracked for visualization

1476 purposes. Scale bar of 50  $\mu\text{m}$ .



1477 <https://www.dropbox.com/s/qvwnyysbij6iz3b/Movie%206.avi?dl=0>

1478 **Movie S5. Typical motility and  $\text{Ca}^{2+}$  responses of *S. purpuratus* spermatozoa**

1479 **towards an *f4*-generated speract concentration gradient.** An optical fiber of 4 mm

1480 internal diameter (*f4*) was used for the UV light path to generate the speract

1481 concentration gradient. Other imaging conditions were set up as for **Movie 1**. Note that

1482 spermatozoa re-located after speract uncaging but they failed to experience chemotaxis

1483 (compare with **Movie 1**). The pseudo-color scale represents the relative fluorescence

1484 of fluo-4, a  $\text{Ca}^{2+}$  indicator, showing maximum (red) and minimum (blue) relative

1485  $[\text{Ca}^{2+}]_i$ . Six *S. purpuratus* spermatozoa were manually tracked for visualization

1486 purposes. Scale bar of 50  $\mu\text{m}$ .

1487 <https://www.dropbox.com/s/o5o1e2jpmfitb1k/Movie%207.avi?dl=0>

1488 **Movie S6. Typical motility and  $\text{Ca}^{2+}$  responses of *S. purpuratus* spermatozoa**

1489 **towards an *f5*-generated speract concentration gradient.** An optical fiber of 4 mm

1490 internal diameter (*f5*) was used for the UV light path to generate the speract

1491 concentration gradient. Other imaging conditions were set up as for **Movie 1**. Note that

1492 spermatozoa located at R2, R3 and R4 regions prior to speract exposure swim up the

1493 speract concentration gradient, towards the center of the imaging field (R1). The

1494 pseudo-color scale represents the relative fluorescence of fluo-4, a  $\text{Ca}^{2+}$  indicator,

1495 showing maximum (red) and minimum (blue) relative  $[\text{Ca}^{2+}]_i$ . Six *S. purpuratus*

1496 spermatozoa were manually tracked for visualization purposes. Scale bar of 50  $\mu\text{m}$ .

1497 [https://www.dropbox.com/s/j4dlysh9k4r1lrp/Movie 10.avi?dl=0](https://www.dropbox.com/s/j4dlysh9k4r1lrp/Movie_10.avi?dl=0)

1498 **Movie S7. Chemotactic index distributions.** Radial histograms of chemotactic indi-  
1499 ces from each different speract gradient. Black (*f*<sub>2</sub>) or red (rest) lines represent the me-  
1500 dian of each distribution. This analysis was implemented from 4.5 seconds to 10 sec-  
1501 onds. Speract uncaging was induced at 3 seconds.

1502 <https://www.dropbox.com/s/dtfug8i1ckj6nku/Movie%2011.avi?dl=0>

1503 **Movie S8. Photo-release of caged speract induces  $\text{Ca}^{2+}$  oscillations in immobilized**

1504 ***S. purpuratus* spermatozoa.** Spermatozoa were immobilized, by coating the cover slip

1505 with poly-D-lysine, in artificial sea water containing 500 nM caged speract, 3 s before

1506 and during 6 s after 200 ms of UV irradiation. The *f4* optical fiber was used for the UV

1507 light path to generate the speract concentration gradient. The optical fiber was mounted

1508 in a “defocused” configuration to minimize the generation of UV light heterogeneities.

1509 93 frames  $\text{s}^{-1}$ , 40x/1.3NA oil-immersion objective, 4x4 binning. The pseudo-color scale

1510 represents the relative fluorescence of fluo-4, a  $\text{Ca}^{2+}$  indicator, showing maximum (red)

1511 and minimum (blue) relative  $[\text{Ca}^{2+}]_i$ . The brightness and contrast scale was adjusted for

1512 better visualization of  $[\text{Ca}^{2+}]_i$  transients in the sperm flagella (as a consequence some

1513 heads look artificially oversaturated, however no fluorescence saturation was observed

1514 in the raw data).

## 1515 References

- 1516 Beltrán C, Rodríguez-Miranda E, Granados-González G, García de De la Torre L,  
1517 Nishigaki T, Darszon A. 2014. Zn<sup>2+</sup> induces hyperpolarization by activation of a  
1518 K<sup>+</sup> channel and increases intracellular Ca<sup>2+</sup> and pH in sea urchin spermatozoa.  
1519 *Dev Biol* **394**:15–23. doi:10.1016/j.ydbio.2014.07.017
- 1520 Berg HC, Purcell EM. 1977. Physics of chemoreception. *Biophys J* **20**:193–219.  
1521 doi:10.1016/S0006-3495(77)85544-6
- 1522 Garcés Y, Guerrero A, Hidalgo P, López RE, Wood CD, Gonzalez RA, Rendón-  
1523 Mancha JM. 2016. Automatic detection and measurement of viral replication  
1524 compartments by ellipse adjustment. *Sci Rep* **6**:1–14. doi:10.1038/srep36505
- 1525 Guerrero A, Espinal J, Wood CD, Rendon JM, Carneiro J, Martinez-Mekler G,  
1526 Darszon A, Rendón JM, Carneiro J, Martínez-Mekler G, Darszon A. 2013.  
1527 Niflumic acid disrupts marine spermatozoan chemotaxis without impairing the  
1528 spatiotemporal detection of chemoattractant gradients. *J Cell Sci* **126**:1477–87.  
1529 doi:10.1242/jcs.121442
- 1530 Guerrero A, Nishigaki T, Carneiro J, Tatsu Y, Wood CD, Darszon A, Yoshiro T,  
1531 Wood CD, Darszon A. 2010. Tuning sperm chemotaxis by calcium burst timing.  
1532 *Dev Biol* **344**:52–65. doi:10.1016/j.ydbio.2010.04.013
- 1533 Kashikar ND, Alvarez L, Seifert R, Gregor I, Jäckle O, Beyermann M, Krause E,  
1534 Kaupp UB, Benjamin Kaupp U. 2012. Temporal sampling, resetting, and  
1535 adaptation orchestrate gradient sensing in sperm. *J Cell Biol* **198**:1075–1091.  
1536 doi:10.1083/jcb.201204024
- 1537 Maxwell C. 1877. On the Electrical Capacity of a long narrow Cylinder, and of a Disk  
1538 of sensible Thickness. *Proc London Math Soc* **s1-9**:94–102.  
1539 doi:10.1112/plms/s1-9.1.94
- 1540 Nishigaki T, Darszon A. 2000. Real-Time Measurements of the Interactions between  
1541 Fluorescent Speract and Its Sperm Receptor. *Dev Biol* **223**:17–26.  
1542 doi:10.1006/dbio.2000.9734
- 1543 Nishigaki T, Zamudio FZ, Possani LD, Darszon A. 2001. Time-resolved sperm  
1544 responses to an egg peptide measured by stopped-flow fluorometry. *Biochem*  
1545 *Biophys Res Commun* **284**:531–5. doi:10.1006/bbrc.2001.5000
- 1546 Phillips R, Kondev J, Theriot J, Garcia H. 2012. Physical Biology of the Cell, 2nd ed.  
1547 Garland Science.
- 1548 Pichlo M, Bungert-Plümke S, Weyand I, Seifert R, Bönigk W, Strünker T, Kashikar  
1549 ND, Goodwin N, Müller A, Körschen HG, Collienne U, Pelzer P, Van Q,  
1550 Enderlein J, Klemm C, Krause E, Trötschel C, Poetsch A, Kremmer E, Kaupp  
1551 UB. 2014. High density and ligand affinity confer ultrasensitive signal detection  
1552 by a guanylyl cyclase chemoreceptor. *J Cell Biol* **206**:541–557.  
1553 doi:10.1083/jcb.201402027
- 1554 Schneider CA, Rasband WS, Eliceiri KW, Instrumentation C. 2017. NIH Image to  
1555 ImageJ : 25 years of Image Analysis **9**:671–675.
- 1556 Tatsu Y, Nishigaki T, Darszon A, Yumoto N. 2002. A caged sperm-activating peptide  
1557 that has a photocleavable protecting group on the backbone amide. *FEBS Lett*  
1558 **525**:20–24. doi:10.1016/S0014-5793(02)03000-4
- 1559 Vergassola M, Villermaux E, Shraiman BI. 2007. ‘Infotaxis’ as a strategy for  
1560 searching without gradients. *Nature* **445**:406–9. doi:10.1038/nature05464
- 1561 Wood CD, Nishigaki T, Furuta T, Baba SA, Darszon A. 2005. Real-time analysis of  
1562 the role of Ca<sup>2+</sup> in flagellar movement and motility in single sea urchin sperm.  
1563 *J Cell Biol* **169**:725–731. doi:10.1083/jcb.200411001

1564 Wood CD, Nishigaki T, Tatsu Y, Yumoto N, Baba SA, Whitaker M, Darszon A.  
1565 2007. Altering the speract-induced ion permeability changes that generate  
1566 flagellar Ca<sup>2+</sup> spikes regulates their kinetics and sea urchin sperm motility. *Dev*  
1567 *Biol* **306**:525–537. doi:10.1016/j.ydbio.2007.03.036  
1568  
1569
